# Supplementary material for: Impact of Three Different Mutations in Ehrlichia chaffeensis in Altering the Global Gene Expression Patterns
Source: PubMed Central journal article supplement (PMC5906474; doi:10.1038/s41598-018-24471-3), 2018-04-18

**Impact of Three Different Mutations in *Ehrlichia chaffeensis* in Altering the  
Global Gene Expression Patterns**

Chandramouli Kondethimmanahalli and Roman Ganta\*

Center of Excellence for Vector-Borne Diseases, Department of Diagnostic Medicine/Pathobiology,  
College of Veterinary Medicine, Kansas State University, Manhattan, Kansas, USA 66506

\*Corresponding author; [rganta@vet.k-state.edu](mailto:rganta@vet.k-state.edu)

**Fig. S1.** Bioanalyzer analysis data of cell-free *E. chaffeensis* RNA before (A) and after RNA enrichment (B) steps. Lane L, RNA ladder; 1, Wildtype ECH\_7000; 2, mutant ECH\_0660; 3, mutant ECH\_0379; 4, mutant ECH\_0490. Note: The Bioanalyzer data for lane 4 of panel B was from a different gel run separately and RNA markers to define the sizes of the resolved RNAs were also ran separately. The original data files for lane 4 and its associated markers were presented on the last page of this file (page # 41).

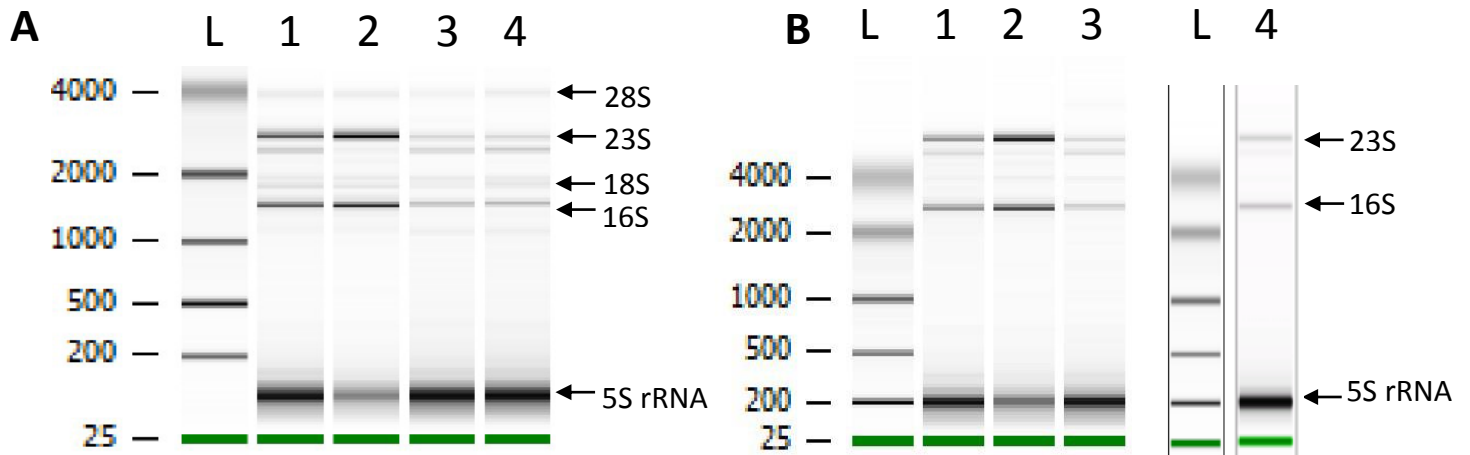

**Fig. S2.** Chromatogram of cell-free *E. chaffeensis*. RNA before (A) and after enrichment (B). 18S and 28S peaks represent host cell ribosomal RNAs; 16S and 23S represent *E. chaffeensis* ribosomal RNAs.

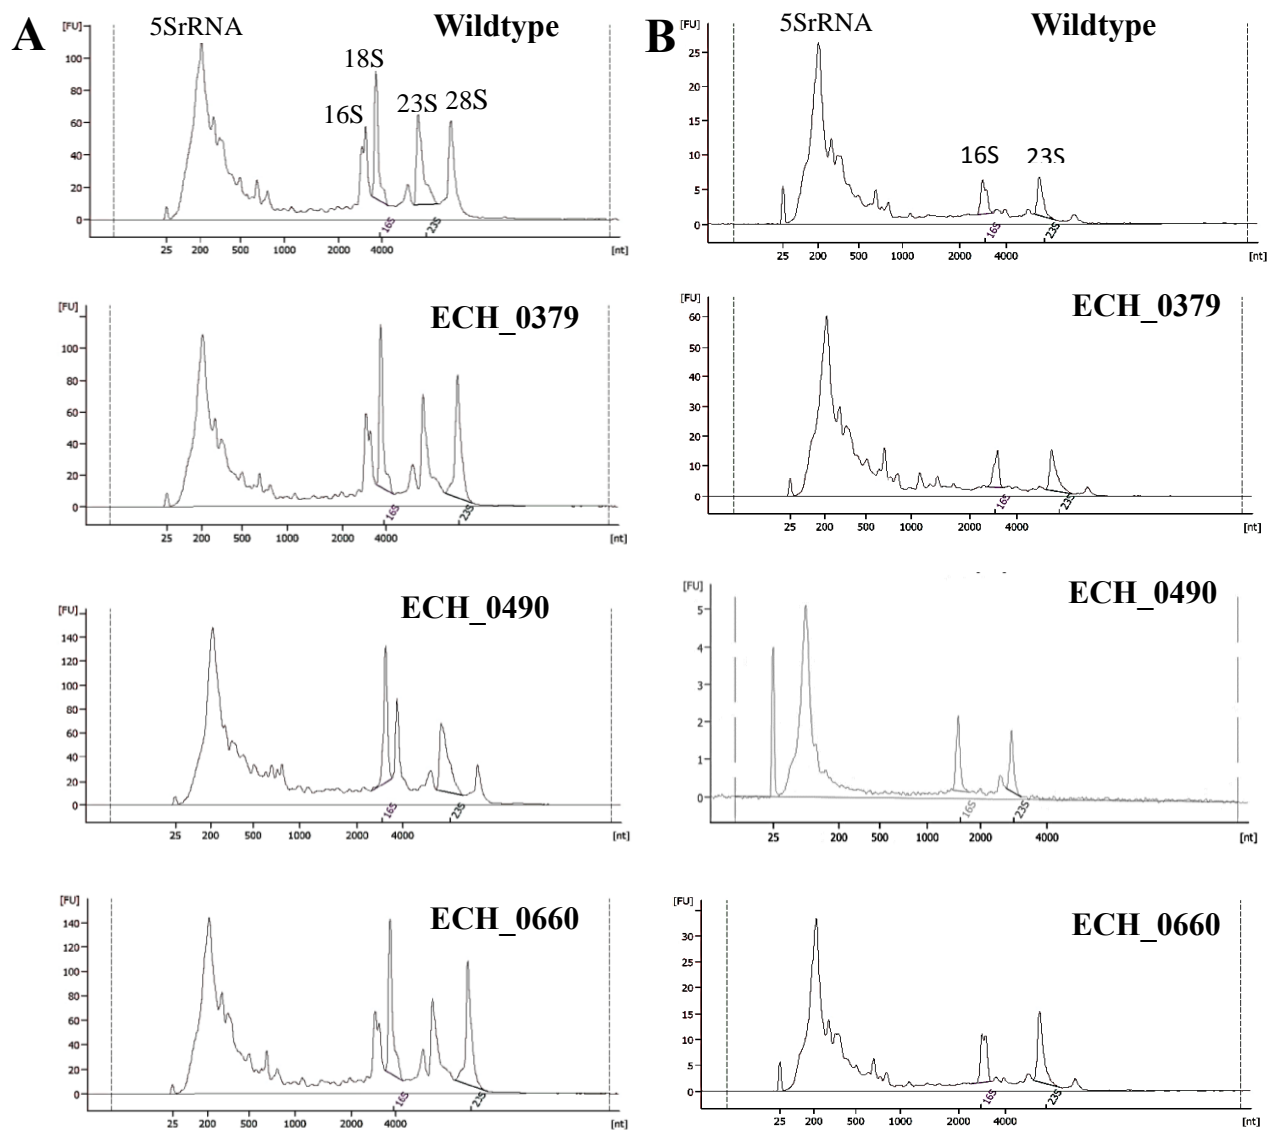

**Fig. S3.** Distribution of differentially expressed genes in mutants ECH\_0379 (A) and ECH\_0490 (B) compared to wildtype. Transcripts with  $\geq 1$  FPKM and minimum of 10 mapped reads were used. The plot is on a log-transformed scale.

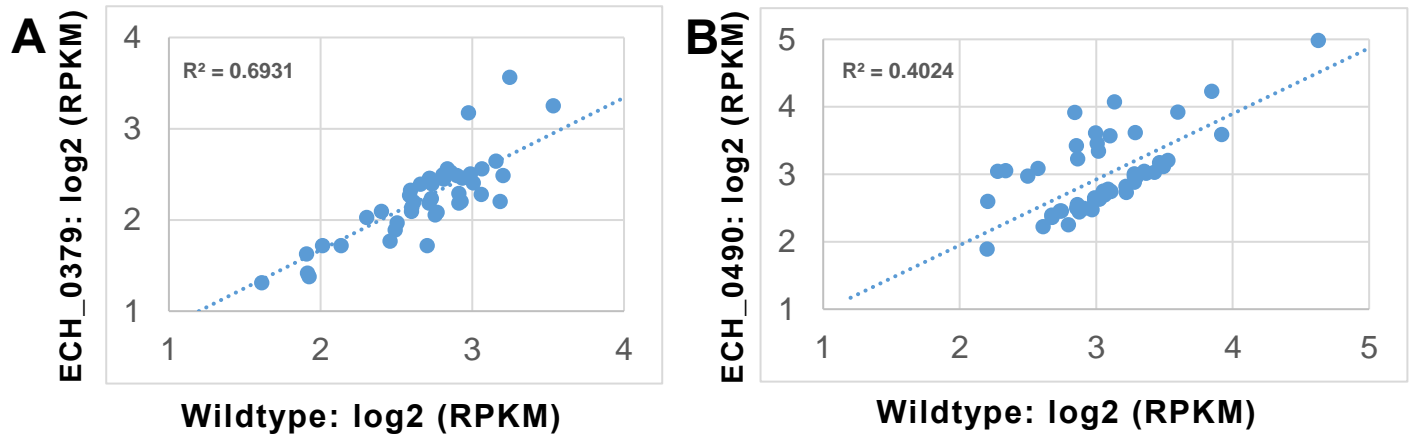

**Fig. S4.** Semi-quantitative RT-PCR targeting to *E. chaffeensis* genes ECH\_0490 and ECH\_0492 in the ECH\_0490 mutant. RNA from wild-type and mutant was used as templates for RT-PCR analysis. Lane 1 and 6, RNA from wild-type *E.chaffeensis*; lane 2 and 7 RNA from the mutant; lane 3 and 8 without reverse transcriptase; lane 4 and 9 without a template; lane 5 and 10 genomic DNA (positive control).

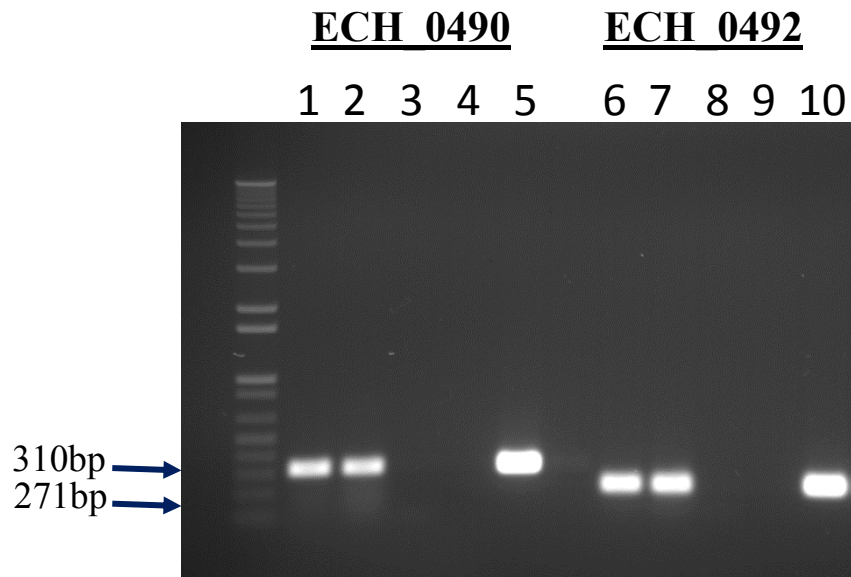

**Fig. S5.** Schematic diagram of infection, isolation and purification of cell-free *E. chaffeensis*.

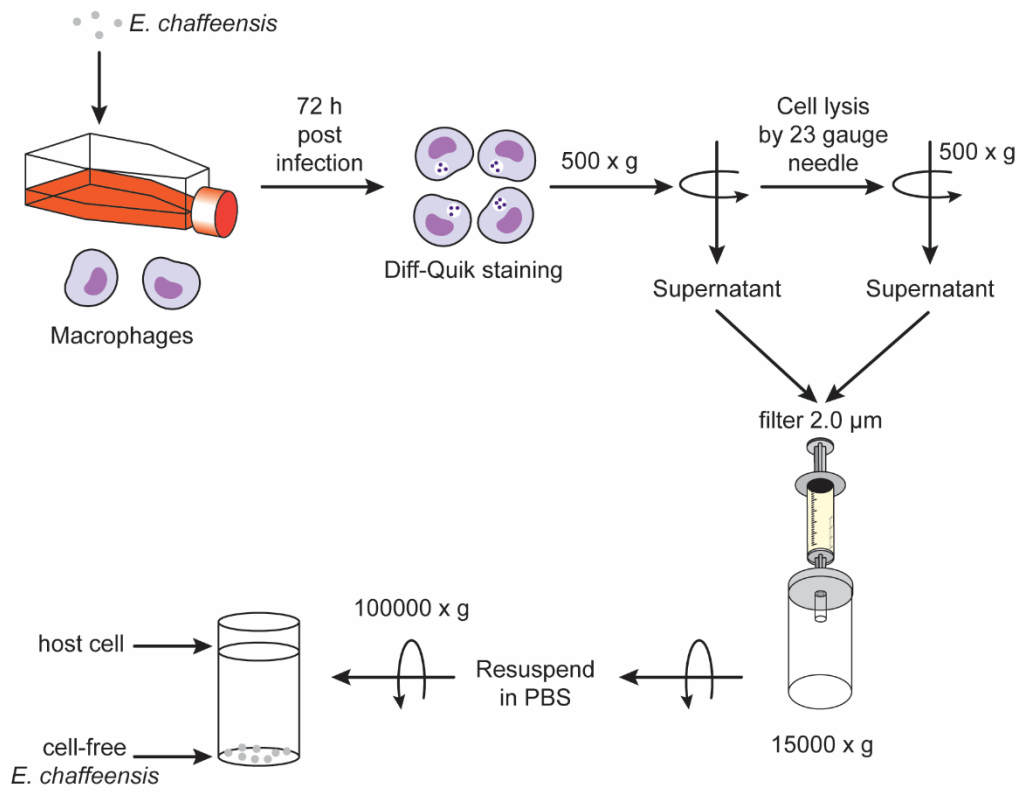

**Note:** The above illustration was made by Ms. Mal Rooks Hoover, Kansas State University. We thank Ms. Hoover for her help in preparing this schematic diagram as per our direction. She granted the permission in writing for its publication.

**Fig. S6.** Workflow of sample preparation and RNA sequencing of *E. chaffeensis* wildtype and mutants organisms.

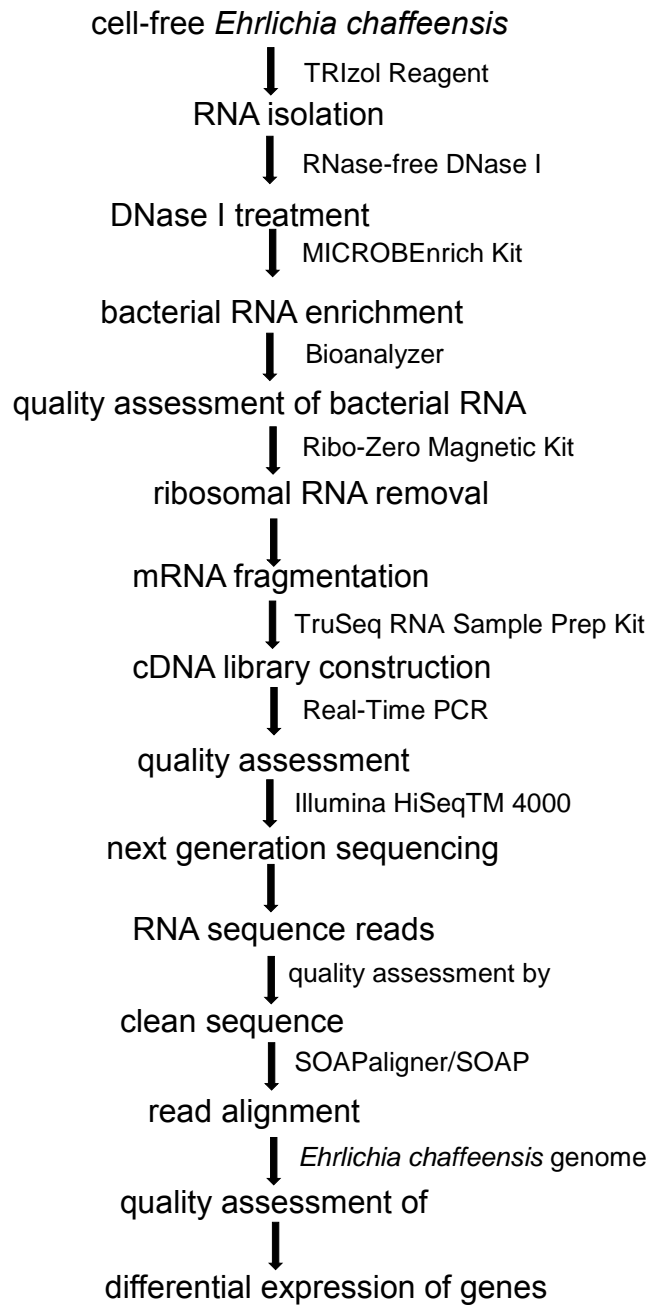

Table S1: *E. chaffeensis* genes identified in wildtype and mutants by mapping the reads against the reference genome of *E. chaffeensis* Arkansas (GenBank # CP000236.1). Blank cells in table indicate that the expression values are not determined.

| Gene ID  | Product                                                          | Wildtype RPKM | ECH_0379 RPKM | ECH_0490 RPKM | ECH_0660 RPKM |
|----------|------------------------------------------------------------------|---------------|---------------|---------------|---------------|
| ECH_0001 | chromosome partitioning protein, ParB family;                    | 66.7072       | 52.645        | 267.662       | 66.136        |
| ECH_0002 | 16S rRNA processing protein RimM;                                | 267.208       | 195.06        | 232.814       | 211.93        |
| ECH_0003 | tRNA (guanine-N1)-methyltransferase;                             | 2602.4        | 2718.1        | 2247.97       | 3681.1        |
| ECH_0004 | ribosomal protein L19;                                           | 3780.85       | 3080.6        | 2242.17       | 3986.5        |
| ECH_0005 | competence/damage-inducible protein CinA C-terminal domain;      | 276.177       | 196.65        | 212.997       | 248.46        |
| ECH_0006 | threonyl-tRNA synthetase;                                        | 1004          | 1114.2        | 1023.87       | 887.85        |
| ECH_0007 | translation initiation factor IF-3;                              | 2214.83       | 1950          | 2032.65       | 1806.6        |
| ECH_0008 | P-loop hydrolase family protein;                                 | 2879.4        | 1697.1        | 5032.04       | 2216          |
| ECH_0009 | putative membrane protein;                                       | 7047.64       | 8575.6        | 16828.8       | 9129.3        |
| ECH_0010 | hypothetical protein;                                            | 3668.83       | 2730.9        | 5511.99       | 3101.1        |
| ECH_0011 | glyceraldehyde-3-phosphate dehydrogenase, type I;                | 324.57        | 376.49        | 641.842       | 299.75        |
| ECH_0012 | Es1 family protein;                                              | 472.919       | 473.69        | 524.576       | 620.9         |
| ECH_0013 | putative pyrroline-5-carboxylate reductase;                      | 716.491       | 604.84        | 726.851       | 708.2         |
| ECH_0014 | DNA polymerase III, subunits gamma and tau;                      | 715.401       | 547.07        | 554.065       | 538.21        |
| ECH_0015 | conserved hypothetical protein;                                  | 1545.19       | 1037          | 1395.44       | 1392.2        |
| ECH_0016 | aspartate-semialdehyde dehydrogenase;                            | 501.628       | 659.88        | 505.551       | 724.87        |
| ECH_0018 | S-adenosylmethionine synthetase;                                 | 377.755       | 364.38        | 548.751       | 429.23        |
| ECH_0020 | ubiquinone biosynthesis hydroxylase, UbiH/UbiF/VisC/COQ6 family; | 170.339       | 125.77        | 275.779       | 109.42        |
| ECH_0021 | conserved hypothetical protein;                                  | 397.115       | 210.65        | 396.346       | 291.96        |
| ECH_0023 | glycyl-tRNA synthetase, alpha subunit;                           | 1801.17       | 1749          | 1358.42       | 1886.5        |
| ECH_0024 | glycyl-tRNA synthetase, beta subunit;                            | 561.858       | 386.62        | 606.541       | 378.99        |
| ECH_0025 | chaperone protein DnaJ;                                          | 429.018       | 575.56        | 741.505       | 481.42        |
| ECH_0026 | nicotinate-nucleotide pyrophosphorylase;                         | 433.97        | 437.43        | 469.829       | 339.1         |
| ECH_0027 | putative membrane protein, TIGR00023;                            | 134.886       | 238.28        | 792.217       | 214.57        |
| ECH_0028 | crossover junction endodeoxyribonuclease RuvC;                   | 516.513       | 508.26        | 370.879       | 443.19        |
| ECH_0029 | cytochrome c oxidase, subunit III;                               | 2155.69       | 2165          | 2164.43       | 1668.3        |
| ECH_0030 | uroporphyrinogen decarboxylase;                                  | 228.408       | 253.9         | 579.382       | 271.79        |
| ECH_0031 | hemolysin;                                                       | 470.629       | 523.5         | 590.148       | 521.99        |



|          |                                                                 |         |        |          |        |
|----------|-----------------------------------------------------------------|---------|--------|----------|--------|
| ECH_0032 | phage prohead protease, HK97 family;                            | 82.835  | 26.064 |          | 58.14  |
| ECH_0033 | phage portal protein, HK97 family;                              | 41.4532 | 20.41  |          | 26.993 |
| ECH_0035 | putative biotin synthesis protein BioC;                         | 407.75  | 242.48 | 353.681  | 267.49 |
| ECH_0036 | quinolinate synthetase complex, subunit A;                      | 756.976 | 714.81 | 643.554  | 807.23 |
| ECH_0038 | ferredoxin A;                                                   | 112.982 | 166.92 | 393.663  | 192.23 |
| ECH_0039 | 120 kDa immunodominant surface protein;                         | 316.256 | 495.77 | 931.81   | 413.87 |
| ECH_0040 | type IV secretion system protein VirD4;                         | 825.555 | 901.06 | 603.242  | 730.54 |
| ECH_0041 | type IV secretion system protein VirB11;                        | 783.237 | 830.35 | 453.337  | 734.3  |
| ECH_0042 | type IV secretion system protein VirB10;                        | 1221.68 | 1161.9 | 852.046  | 1130.3 |
| ECH_0043 | type IV secretion system protein VirB9;                         | 850.763 | 845.47 | 480.117  | 747.21 |
| ECH_0044 | type IV secretion system protein VirB8;                         | 1733.53 | 1250.2 | 434.943  | 1320.4 |
| ECH_0045 | putative GTP cyclohydrolase II;                                 | 384.785 | 449.57 | 718.863  | 439.12 |
| ECH_0048 | TPR domain protein;                                             | 422.257 | 184.54 | 229.553  | 178.25 |
| ECH_0049 | hypothetical protein;                                           | 1294.48 | 397.03 | 581.209  | 440.38 |
| ECH_0050 | diaminopimelate epimerase;                                      | 401.232 | 473.17 | 418.443  | 430.77 |
| ECH_0052 | conserved hypothetical protein;                                 | 457.936 | 164.52 |          | 149.45 |
| ECH_0055 | phosphoglycerate kinase;                                        | 443.541 | 349.56 | 359.432  | 353.74 |
| ECH_0056 | putative exodeoxyribonuclease VII, large subunit;               | 91.4889 | 120.85 | 127.51   | 93.511 |
| ECH_0057 | zinc finger-like domain protein;                                | 172.908 | 156.04 | 563.433  | 236.06 |
| ECH_0058 | 2,3,4,5-tetrahydropyridine-2-carboxylate N-succinyltransferase; | 1902.02 | 2742.8 | 1006.7   | 3089.7 |
| ECH_0060 | tRNA modification GTPase TrmE;                                  | 179.101 | 175.03 | 279.376  | 210.23 |
| ECH_0061 | putative flavoprotein;                                          | 199.434 | 165.75 | 238.297  | 199.27 |
| ECH_0062 | ATP-dependent DNA helicase RecG;                                | 78.5055 | 73.684 | 1006.889 | 83.673 |
| ECH_0063 | putative NADH-ubiquinone oxidoreductase, homolog;               | 224.907 | 196.56 | 705.427  | 223.96 |
| ECH_0064 | DnaK suppressor protein;                                        | 601.46  | 756.05 | 479.242  | 674.97 |
| ECH_0065 | putative heme exporter protein CcmB;                            | 235.804 | 193.13 | 253.716  | 210.93 |
| ECH_0067 | cation diffusion facilitator transporter family protein;        | 593.705 | 490.64 | 702.472  | 500.2  |
| ECH_0069 | conserved hypothetical protein;                                 | 180.367 | 66.277 |          | 67.84  |
| ECH_0071 | ribosomal protein S20;                                          | 6265.18 | 5151.6 | 4807.4   | 7407.4 |
| ECH_0072 | 1-acyl-sn-glycerol-3-phosphate acyltransferase family protein;  | 127.641 | 180.09 |          | 164.54 |
| ECH_0073 | peptide deformylase;                                            | 325.494 | 451.66 | 969.895  | 392.5  |
| ECH_0074 | uracil-DNA glycosylase, family 4;                               | 576.335 | 737.82 | 625.576  | 821.35 |

|          |                                                                                   |         |        |         |        |
|----------|-----------------------------------------------------------------------------------|---------|--------|---------|--------|
| ECH_0076 | putative DNA replication and repair protein RecF;                                 | 287.159 | 59.972 | 213.924 | 56.14  |
| ECH_0077 | ornithine carbamoyltransferase;                                                   | 1405.67 | 1138.5 | 1418.81 | 727.57 |
| ECH_0078 | hypothetical protein;                                                             | 1538.63 | 927.88 | 1929.58 | 893.51 |
| ECH_0079 | hypothetical protein;                                                             | 8953.79 | 10651  | 12156.8 | 8293.1 |
| ECH_0080 | DNA polymerase I;                                                                 | 486.359 | 391.44 | 479.242 | 409.91 |
| ECH_0082 | ribulose-phosphate 3-epimerase;                                                   | 167.622 | 197.19 | 395.532 | 184.52 |
| ECH_0084 | conserved hypothetical protein;                                                   | 527.759 | 440.41 | 812.628 | 365.63 |
| ECH_0085 | ABC transporter, ATP-binding protein;                                             | 1119.2  | 438.7  | 523.357 | 292.15 |
| ECH_0088 | octaprenyl-diphosphate synthase;                                                  | 193.386 | 98.67  | 205.075 | 138.8  |
| ECH_0089 | glutamine synthetase, type I;                                                     | 2144.31 | 2090.8 | 1694.14 | 1956.7 |
| ECH_0091 | tyrosyl-tRNA synthetase;                                                          | 912.481 | 932.31 | 844.107 | 720.75 |
| ECH_0092 | 5-aminolevulinic acid synthase;                                                   | 1046.55 | 1116.4 | 523.311 | 1087.8 |
| ECH_0093 | conserved hypothetical protein;                                                   | 107.47  | 67.893 |         | 60.866 |
| ECH_0095 | protein-export membrane protein SecF;                                             | 1921.25 | 551.26 | 990.271 | 640.13 |
| ECH_0097 | fructose-biphosphate aldolase, class I;                                           | 2049.45 | 2926.1 | 1804.21 | 2783.3 |
| ECH_0098 | pyruvate dehydrogenase complex, E2 component, dihydrolipoamide acetyltransferase; | 1130.83 | 1430.8 | 972.276 | 1588.4 |
| ECH_0105 | hypothetical protein;                                                             | 147.605 | 932.86 | 1182.65 | 816.13 |
| ECH_0106 | hypothetical protein;                                                             | 44.1482 | 51.982 | 682.618 | 55.079 |
| ECH_0108 | hypothetical protein;                                                             | 310.22  | 331.76 | 990.23  | 218.03 |
| ECH_0113 | hypothetical protein;                                                             | 18.2492 | 29.215 | 545.938 | 22.296 |
| ECH_0115 | hypothetical protein;                                                             | 124.612 | 92.484 | 422.861 | 69.727 |
| ECH_0116 | hypothetical protein;                                                             | 35.1345 | 51.13  |         | 44.993 |
| ECH_0117 | hypothetical protein;                                                             | 98.9284 | 109.7  | 541.803 | 74.41  |
| ECH_0119 | hypothetical protein;                                                             | 33.4694 | 72.718 |         | 24.987 |
| ECH_0120 | hypothetical protein;                                                             | 198.378 | 239.92 | 997.675 | 152.08 |
| ECH_0121 | hypothetical protein;                                                             | 81.9805 | 76.275 | 286.376 | 93.149 |
| ECH_0122 | hypothetical protein;                                                             | 5514.52 | 5847.3 | 7539.57 | 4736.4 |
| ECH_0123 | GMP synthase;                                                                     | 435.097 | 511.18 | 622.015 | 529.04 |
| ECH_0124 | citrate synthase I;                                                               | 165.815 | 169.11 | 527.511 | 217.23 |
| ECH_0125 | glutamate--cysteine ligase;                                                       | 385.471 | 185.12 | 577.19  | 268.62 |
| ECH_0126 | conserved hypothetical protein;                                                   | 61.4653 | 55.396 |         | 59.616 |
| ECH_0127 | lipoprotein releasing system transmembrane protein, LolC/E family;                | 627.171 | 585.47 | 703.122 | 586.53 |
| ECH_0128 | putative lipoprotein;                                                             | 712.569 | 500.36 | 416.33  | 488.5  |

|          |                                                                      |         |        |         |        |
|----------|----------------------------------------------------------------------|---------|--------|---------|--------|
| ECH_0129 | HemY domain protein;                                                 | 520.609 | 427.97 | 460.279 | 415.83 |
| ECH_0130 | conserved hypothetical protein;                                      | 173.46  | 269.27 |         | 274.33 |
| ECH_0131 | ATP synthase F1, delta subunit;                                      | 1871.03 | 1691.1 | 2168.18 | 1768.4 |
| ECH_0132 | ATP synthase F1, alpha subunit;                                      | 1248.11 | 1602.3 | 1099.44 | 1621.9 |
| ECH_0133 | transcription elongation factor GreA;                                | 335.306 | 571.15 | 383.688 | 577.09 |
| ECH_0134 | 3,4-dihydroxy-2-butanone 4-phosphate synthase;                       | 550.385 | 938.09 | 620.528 | 911.41 |
| ECH_0135 | SsrA-binding protein;                                                | 350.808 | 408.27 | 345.054 | 537.71 |
| ECH_0136 | valyl-tRNA synthetase;                                               | 223.729 | 227.86 | 303.895 | 235.62 |
| ECH_0137 | cytochrome c-type biogenesis protein CcmF;                           | 330.156 | 230.29 | 457.357 | 207.99 |
| ECH_0138 | aminomethyl transferase family protein;                              | 268.787 | 196.22 | 371.026 | 209.93 |
| ECH_0139 | amidophosphoribosyltransferase;                                      | 461.748 | 538.42 | 363.313 | 347.74 |
| ECH_0141 | peptidyl-tRNA hydrolase;                                             | 342.351 | 449.17 | 520.183 | 802.76 |
| ECH_0142 | ribosomal 5S rRNA E-loop binding protein Ctc/L25/TL5;                | 2875.81 | 2343.9 | 2146.37 | 2856.3 |
| ECH_0143 | putative competence protein F;                                       | 155.166 | 190.13 | 270.741 | 201.03 |
| ECH_0144 | succinyl-diaminopimelate desuccinylase;                              | 1837.35 | 1974.8 | 1275.89 | 1666.1 |
| ECH_0146 | putative glutathione-regulated potassium-efflux system protein KefB; | 1877.75 | 1910.7 | 1269.7  | 1515.6 |
| ECH_0147 | conserved hypothetical protein;                                      | 4121.06 | 3681.2 | 2512.32 | 2933.3 |
| ECH_0148 | putative membrane protein;                                           | 466.341 | 351.95 | 416.445 | 514.19 |
| ECH_0149 | putative pyruvate dehydrogenase complex, E1 component, beta subunit; | 567.198 | 534.06 | 498.671 | 611.97 |
| ECH_0150 | hypothetical protein;                                                | 846.48  | 869.97 | 2009.19 | 752.55 |
| ECH_0152 | tldD protein;                                                        | 516.565 | 606.03 | 1184.28 | 715.62 |
| ECH_0154 | GTP-binding protein YchF;                                            | 1151.99 | 1078.7 | 962.445 | 1045.2 |
| ECH_0156 | 2C-methyl-D-erythritol 2,4-cyclodiphosphate synthase;                | 70.1265 | 158.2  | 396.614 | 226.14 |
| ECH_0157 | 2-C-methyl-D-erythritol 4-phosphate cytidyltransferase;              | 39.6865 | 56.116 | 90.9954 | 54.63  |
| ECH_0158 | hypothetical protein;                                                | 113.558 | 192.17 | 562.376 | 172.61 |
| ECH_0159 | hypothetical protein;                                                | 1307.07 | 1741.9 | 2135.36 | 1155.4 |
| ECH_0160 | phosphoribosylaminoimidazole carboxylase, catalytic subunit;         | 175.525 | 312.97 | 500.637 | 251.78 |
| ECH_0161 | hypothetical protein;                                                | 81.021  | 42.253 |         | 56.913 |
| ECH_0162 | integration host factor, alpha subunit;                              | 817.997 | 1059.6 | 469.752 | 1151.3 |
| ECH_0163 | transcriptional regulator, MerR family;                              | 708.581 | 937.62 | 713.203 | 807.77 |
| ECH_0166 | conserved hypothetical protein;                                      | 42488.4 | 53185  | 96364.3 | 44584  |

|          |                                                             |         |         |         |        |
|----------|-------------------------------------------------------------|---------|---------|---------|--------|
| ECH_0167 | tryptophanyl-tRNA synthetase;                               | 718.03  | 839.9   | 2653.77 | 643.04 |
| ECH_0168 | co-chaperone GrpE;                                          | 1332.1  | 1525.2  | 1036.01 | 1658.5 |
| ECH_0169 | riboflavin biosynthesis protein RibD;                       | 161.402 | 130.23  | 397.149 | 152.18 |
| ECH_0170 | variable length PCR target protein;                         | 17918.5 | 15320   | 10436.2 | 17080  |
| ECH_0171 | CTP synthase;                                               | 1681.69 | 1740.9  | 1149.1  | 1762.9 |
| ECH_0172 | preprotein translocase, SecG subunit;                       | 5505.56 | 5026.7  | 4235.47 | 6092.2 |
| ECH_0173 | tyrosine recombinase XerD;                                  | 246.008 | 282.35  | 250.443 | 313.1  |
| ECH_0174 | ABC transporter, ATP-binding protein;                       | 169.113 | 161.2   | 173.624 | 212.91 |
| ECH_0175 | malate dehydrogenase;                                       | 2711.22 | 2998    | 1326.91 | 2763   |
| ECH_0176 | conserved hypothetical protein;                             | 380.303 | 357.04  | 455.307 | 384.92 |
| ECH_0178 | apolipoprotein N-acyltransferase;                           | 729.203 | 689.44  | 506.928 | 634.78 |
| ECH_0179 | putative NADH dehydrogenase I, N subunit;                   | 320.861 | 286.03  | 495.314 | 303.35 |
| ECH_0181 | hypothetical protein;                                       | 2006.78 | 1525.6  | 2820.16 | 1637.9 |
| ECH_0183 | mce-related protein;                                        | 659.247 | 628.89  | 517.582 | 534.77 |
| ECH_0184 | NADH:ubiquinone oxidoreductase family protein;              | 874.166 | 997.31  | 968.265 | 1039.8 |
| ECH_0185 | ATP cone domain protein;                                    | 300.428 | 134.56  |         | 142.41 |
| ECH_0187 | hypothetical protein;                                       | 29.2971 | 24.678  | 267.662 | 24.284 |
| ECH_0188 | putative surface protein;                                   | 586.722 | 121.881 | 244.584 | 94.135 |
| ECH_0189 | putative iron-binding protein;                              | 2044.66 | 1952    | 1379.72 | 2229.9 |
| ECH_0192 | ribosomal protein S16;                                      | 3521.36 | 3033.2  | 3430.94 | 4111.3 |
| ECH_0193 | major facilitator family transporter;                       | 3894.26 | 2815.8  | 3053.89 | 2934.1 |
| ECH_0195 | oxidoreductase, short chain dehydrogenase/reductase family; | 172.029 | 170.64  | 436.895 | 173.95 |
| ECH_0196 | phenylalanyl-tRNA synthetase, alpha subunit;                | 813.174 | 1013.4  | 944.673 | 149.29 |
| ECH_0197 | ribosomal protein L20;                                      | 4187.32 | 4374.6  | 3605.82 | 4468.7 |
| ECH_0198 | ribosomal protein L35;                                      | 4522.63 | 5973.5  | 3959.11 | 5216.6 |
| ECH_0199 | conserved hypothetical protein;                             | 5628.22 | 4658.2  | 3567.44 | 4034   |
| ECH_0201 | dnaJ domain protein;                                        | 428.977 | 502.6   | 754.807 | 464.05 |
| ECH_0202 | NifU domain protein;                                        | 698.733 | 681.43  | 657.356 | 843.32 |
| ECH_0203 | hypothetical protein;                                       | 23.0611 | 32.626  |         | 27.826 |
| ECH_0204 | thiamine biosynthesis protein ThiS;                         | 149.739 | 114.4   |         | 129.1  |
| ECH_0206 | thiamin biosynthesis ThiG;                                  | 151.941 | 234.64  | 396.614 | 220.53 |
| ECH_0207 | conserved domain protein;                                   | 637.675 | 82.128  | 292.419 | 177.65 |
| ECH_0208 | glutamyl-tRNA synthetase;                                   | 313.18  | 399.85  | 330.289 | 334.8  |
| ECH_0210 | surA domain protein;                                        | 882.026 | 802.91  | 1034.73 | 969.12 |

|          |                                                                                     |         |        |         |        |
|----------|-------------------------------------------------------------------------------------|---------|--------|---------|--------|
| ECH_0211 | putative methyltransferase;                                                         | 407.562 | 401.74 | 1172.06 | 532.89 |
| ECH_0212 | putative transporter;                                                               | 145.024 | 218.03 | 480.814 | 199.33 |
| ECH_0213 | putative oxidoreductase;                                                            | 631.89  | 1134.1 | 883.175 | 1507.8 |
| ECH_0214 | putative exodeoxyribonuclease VII, small subunit;                                   | 451.926 | 471.3  | 581.937 | 514.48 |
| ECH_0217 | tRNA modification enzyme, MiaB family;                                              | 186.502 | 210.44 | 741.491 | 194.76 |
| ECH_0218 | thioredoxin;                                                                        | 1254.57 | 1105.4 | 838.674 | 1342.8 |
| ECH_0219 | type IV secretion system protein, VirB9;                                            | 1629.37 | 1678.9 | 636.632 | 1663.3 |
| ECH_0220 | pyruvate dehydrogenase complex, E1 component, pyruvate dehydrogenase alpha subunit; | 242.583 | 265.92 | 144.649 | 316.53 |
| ECH_0221 | putative hydrolase;                                                                 | 128.442 | 117.21 | 83.2368 | 132.58 |
| ECH_0224 | inosine-5'-monophosphate dehydrogenase;                                             | 726.534 | 925.97 | 807.612 | 894.18 |
| ECH_0225 | putative ATP-NAD kinase;                                                            | 681.741 | 745.11 | 1004.77 | 781.35 |
| ECH_0226 | ribosomal protein L31;                                                              | 2234.36 | 2246.4 | 2610.61 | 2774.1 |
| ECH_0227 | malonyl CoA-acyl carrier protein transacylase;                                      | 11175.8 | 10093  | 10403.5 | 9370.7 |
| ECH_0229 | thymidylate kinase;                                                                 | 1341.17 | 969.01 | 2039.73 | 666.76 |
| ECH_0230 | putative membrane protein;                                                          | 991.5   | 2096   | 4109.04 | 1271.2 |
| ECH_0232 | tim44-like domain protein;                                                          | 488.128 | 368.83 | 526.491 | 345.9  |
| ECH_0233 | protein-export protein SecB;                                                        | 4262.32 | 2778.4 | 1715.47 | 4184.4 |
| ECH_0234 | conserved hypothetical protein;                                                     | 521.075 | 269.51 | 384.786 | 426.86 |
| ECH_0235 | peptidase, M16 family;                                                              | 280.714 | 261.65 | 301.514 | 298.98 |
| ECH_0237 | conserved hypothetical protein;                                                     | 969.034 | 1198.8 | 834.066 | 1222.8 |
| ECH_0239 | riboflavin synthase, alpha subunit;                                                 | 111.216 | 194.79 | 196.996 | 214.05 |
| ECH_0243 | hypothetical protein;                                                               | 467.778 | 678.55 | 1063.62 | 4.4854 |
| ECH_0246 | hypothetical protein;                                                               | 991.044 | 1416.5 | 1633.07 | 594.07 |
| ECH_0247 | conserved domain protein;                                                           | 459.756 | 842.13 | 1017.8  | 662.32 |
| ECH_0248 | hypothetical protein;                                                               | 166.083 | 86.602 |         | 75.746 |
| ECH_0250 | transcription-repair coupling factor;                                               | 76.5985 | 72.486 | 266.011 | 57.677 |
| ECH_0251 | hypothetical protein;                                                               | 1042.08 | 1591.5 | 2185.27 | 1271.8 |
| ECH_0252 | hypothetical protein;                                                               | 9827.77 | 13414  | 14493.5 | 9697.6 |
| ECH_0253 | hypothetical protein;                                                               | 10952.4 | 9091.6 | 11464   | 8297.5 |
| ECH_0254 | hypothetical protein;                                                               | 1395.19 | 1438.6 | 2507.66 | 1348.8 |
| ECH_0255 | hypothetical protein;                                                               | 41.2433 | 57.479 | 241.742 | 39.492 |
| ECH_0256 | hypothetical protein;                                                               | 76.6108 | 118.63 | 679.474 | 143.28 |
| ECH_0257 | hypothetical protein;                                                               | 234.051 | 408.76 | 750.531 | 344.93 |

|          |                                                           |         |         |         |        |
|----------|-----------------------------------------------------------|---------|---------|---------|--------|
| ECH_0259 | hypothetical protein;                                     | 220.029 | 257.31  |         | 25.689 |
| ECH_0261 | hypothetical protein;                                     | 1525.25 | 2062.3  |         | 366.37 |
| ECH_0263 | ribonuclease HI;                                          | 1516.6  | 1832.6  | 1569.76 | 2074.4 |
| ECH_0264 | conserved hypothetical protein;                           | 814.657 | 194.844 | 309.631 | 100.35 |
| ECH_0266 | uridylate kinase;                                         | 877.797 | 1041.5  | 536.947 | 976.12 |
| ECH_0267 | ribosome recycling factor;                                | 494.75  | 588.65  | 742.052 | 635.83 |
| ECH_0269 | putative phosphatidate cytidyltransferase;                | 436.471 | 423.09  | 498.457 | 495.02 |
| ECH_0270 | hypothetical protein;                                     | 39.947  | 42.417  | 258.791 | 44.542 |
| ECH_0272 | hypothetical protein;                                     | 77.8189 | 117.4   | 422.516 | 130.86 |
| ECH_0275 | conserved hypothetical protein;                           | 15.6276 | 16.479  |         | 8.573  |
| ECH_0282 | hypothetical protein;                                     | 22.5963 | 16.496  |         | 16.735 |
| ECH_0284 | hypothetical protein;                                     | 41.9931 | 31.933  | 644.644 | 73.441 |
| ECH_0289 | hypothetical protein;                                     | 102.401 | 52.79   | 601.155 | 82.711 |
| ECH_0290 | phosphoribosylaminoimidazole-succinocarboxamide synthase; | 295.007 | 150.19  | 337.245 | 196.72 |
| ECH_0291 | histidyl-tRNA synthetase;                                 | 433.505 | 343.66  | 578.216 | 282.31 |
| ECH_0292 | conserved domain protein;                                 | 2621.68 | 3000    | 3876.01 | 2278.3 |
| ECH_0293 | disulfide oxidoreductase;                                 | 1912.22 | 1879.5  | 838.189 | 1610   |
| ECH_0294 | putative cytochrome oxidase assembly protein;             | 120.104 | 91.443  | 250.039 | 118.58 |
| ECH_0295 | putative heme exporter protein CcmA;                      | 336.403 | 104.99  |         | 631.46 |
| ECH_0296 | putative deoxycytidine triphosphate deaminase;            | 278.548 | 273.1   | 240.896 | 311.31 |
| ECH_0297 | conserved hypothetical protein;                           | 278.419 | 209.59  | 244.888 | 255.44 |
| ECH_0298 | cold shock protein, CSD family;                           | 8294.62 | 4629    | 3870.01 | 7458.6 |
| ECH_0299 | putative nitrogen regulation protein NtrY;                | 1432.25 | 442.09  | 314.885 | 720.01 |
| ECH_0300 | putative ribonuclease D;                                  | 557.588 | 173.78  | 283.469 | 171.05 |
| ECH_0301 | DNA ligase, NAD-dependent;                                | 289.505 | 300.61  | 500.125 | 278.25 |
| ECH_0302 | glutaredoxin-related protein;                             | 911.486 | 702.18  | 1942.87 | 755.2  |
| ECH_0303 | BolA family protein;                                      | 1109.59 | 1187    | 2856.02 | 1360.7 |
| ECH_0304 | putative thiol:disulfide oxidoreductase;                  | 52.0668 | 91.297  |         | 69.639 |
| ECH_0305 | DNA repair protein RadA;                                  | 158.387 | 178.99  | 205.617 | 150.47 |
| ECH_0306 | TRAP transporter, 4TM/12TM fusion protein;                | 1386.77 | 1178    | 744.915 | 1198.6 |
| ECH_0307 | CvpA family protein;                                      | 517.013 | 316.76  | 395.896 | 446.66 |
| ECH_0308 | ribosomal protein S6;                                     | 14180.2 | 14663   | 14076.7 | 15027  |
| ECH_0309 | putative ribosomal protein S18;                           | 6545.87 | 5164.5  | 3594.32 | 5691.3 |
| ECH_0310 | ribosomal protein L9;                                     | 5385.81 | 6400.4  | 3797.25 | 6018.6 |

|          |                                                                     |         |        |         |        |
|----------|---------------------------------------------------------------------|---------|--------|---------|--------|
| ECH_0311 | serine hydroxymethyltransferase;                                    | 3271.5  | 3754.1 | 2197.57 | 3719.8 |
| ECH_0312 | cyaY protein;                                                       | 695.607 | 545.48 | 803.82  | 589.91 |
| ECH_0313 | ABC transporter, permease/ATP-binding protein;                      | 346.966 | 340.7  | 590.186 | 268.32 |
| ECH_0315 | succinate dehydrogenase, flavoprotein subunit;                      | 2399.91 | 3317.5 | 1504.93 | 3460.1 |
| ECH_0316 | succinate dehydrogenase and fumarate reductase iron-sulfur protein; | 1242.58 | 1351.8 | 707.761 | 1487.5 |
| ECH_0317 | thymidylate synthase, flavin-dependent;                             | 1222    | 1052.1 | 721.694 | 1194.5 |
| ECH_0318 | drug resistance transporter, Bcr/CflA family;                       | 411.906 | 321.57 | 572.593 | 371.27 |
| ECH_0319 | holliday junction DNA helicase RuvB;                                | 176.405 | 193.07 | 215.659 | 179.62 |
| ECH_0320 | holliday junction DNA helicase RuvA;                                | 55.8992 | 45.341 |         | 44.845 |
| ECH_0321 | heme exporter protein CcmC;                                         | 448.921 | 423.8  | 660.742 | 472.71 |
| ECH_0322 | guanylate kinase;                                                   | 191.262 | 194.41 | 585.36  | 272.3  |
| ECH_0324 | FoD bifunctional protein;                                           | 814.143 | 905.27 | 358.238 | 1126.8 |
| ECH_0326 | hydrolase, alpha/beta fold family;                                  | 228.885 | 301    | 578.396 | 308.35 |
| ECH_0327 | cytochrome C, membrane-bound;                                       | 1072.67 | 935.03 | 760.416 | 958.15 |
| ECH_0328 | NADH-ubiquinone/plastoquinone oxidoreductase family protein;        | 102.202 | 91.525 | 184.851 | 102.64 |
| ECH_0329 | hypothetical protein;                                               | 163.898 | 162.79 | 255.386 | 192.18 |
| ECH_0330 | pyruvate, phosphate dikinase;                                       | 928.704 | 1008.6 | 789.598 | 907.27 |
| ECH_0331 | RDD family protein;                                                 | 311.56  | 173.51 |         | 161.92 |
| ECH_0332 | HAD-superfamily hydrolase, subfamily IA, variant 1;                 | 1328.87 | 1473.2 | 623.469 | 1294.4 |
| ECH_0334 | aspartyl-tRNA synthetase;                                           | 664.555 | 712.78 | 616.69  | 694.52 |
| ECH_0335 | putative osmotically inducible protein;                             | 940.446 | 837.98 | 871.135 | 929.58 |
| ECH_0336 | glutathione synthetase;                                             | 171.349 | 217.29 | 341.233 | 192.11 |
| ECH_0337 | putative cell division protein FtsQ;                                | 237.386 | 113.71 | 134.787 | 141.26 |
| ECH_0339 | putative nitrogen regulation protein NtrX;                          | 522.6   | 681.64 | 643.275 | 698.47 |
| ECH_0340 | glycerol-3-phosphate dehydrogenase (NAD(P)+);                       | 114.277 | 169.31 | 303.374 | 114    |
| ECH_0341 | site-specific recombinase, phage integrase family;                  | 123.03  | 161.59 | 456.202 | 89.065 |
| ECH_0342 | phosphoribosylformylglycinamide cycloligase;                        | 937.533 | 813.36 | 842.516 | 1042.7 |
| ECH_0343 | conserved hypothetical protein;                                     | 126.502 | 70.36  | 153.312 | 104.15 |
| ECH_0344 | hypothetical protein;                                               | 528.225 | 241.01 |         | 244.21 |
| ECH_0345 | conserved hypothetical protein;                                     | 1374.45 | 858.68 |         | 852.03 |

|          |                                                                       |         |        |         |         |
|----------|-----------------------------------------------------------------------|---------|--------|---------|---------|
| ECH_0346 | iojap-related protein;                                                | 1107.04 | 745.79 | 1582.66 | 1083    |
| ECH_0347 | peptidase, M48 family;                                                | 428.539 | 311.42 | 272.047 | 366.09  |
| ECH_0348 | conserved hypothetical protein;                                       | 368.164 | 397.66 | 977.371 | 278.33  |
| ECH_0350 | 2-amino-4-hydroxy-6-hydroxymethyl-dihydropteridine-pyrophosphokinase; | 514.398 | 285.64 | 570.862 | 434.43  |
| ECH_0351 | putative phosphoribosylformylglycinamide synthase II;                 | 289.767 | 452.89 | 363.711 | 543.88  |
| ECH_0352 | biotin synthase;                                                      | 750.964 | 695.2  | 448.465 | 513.44  |
| ECH_0353 | hypothetical protein;                                                 | 1683.27 | 1228.8 | 612.005 | 901     |
| ECH_0354 | conserved hypothetical protein;                                       | 607.09  | 695.91 | 439.831 | 604.51  |
| ECH_0355 | M23/M37 peptidase domain protein;                                     | 219.317 | 241.07 | 359.432 | 243.51  |
| ECH_0356 | fructose-1,6-bisphosphatase, class II;                                | 692.47  | 583.44 | 553.151 | 746.44  |
| ECH_0359 | glucose inhibited division protein A;                                 | 636.739 | 656.13 | 561.54  | 518.19  |
| ECH_0362 | putative phosphoribosylformylglycinamide synthase I;                  | 415.46  | 485.87 | 506.96  | 539.47  |
| ECH_0363 | DNA repair protein RadC;                                              | 127.654 | 136.57 | 420.115 | 165.29  |
| ECH_0364 | chaperonin, 10 kDa;                                                   | 6801.56 | 6332.3 | 9012.28 | 12150.9 |
| ECH_0365 | chaperonin, 60 kd;                                                    | 6017.96 | 4994.1 | 3080.28 | 6977.5  |
| ECH_0366 | oxidoreductase, short-chain dehydrogenase/reductase family;           | 678.935 | 702.59 | 727.738 | 976.18  |
| ECH_0367 | ATP-dependent Clp protease, ATP-binding subunit ClpB;                 | 849.54  | 1784.3 | 1274.05 | 1882.8  |
| ECH_0368 | dioxygenase family protein;                                           | 734.38  | 433.01 | 766.788 | 463.38  |
| ECH_0369 | cytosol aminopeptidase;                                               | 2667.92 | 2380.5 | 1502.3  | 2396.7  |
| ECH_0370 | phosphoribosylglycinamide formyltransferase;                          | 800.331 | 809.49 | 443.7   | 798.38  |
| ECH_0371 | lipote-protein ligase B;                                              | 107.595 | 142.42 | 210.644 | 156.08  |
| ECH_0373 | hypothetical protein;                                                 | 477.208 | 569.57 | 519.892 | 580.66  |
| ECH_0374 | DNA / pantothenate metabolism flavoprotein family protein;            | 411.148 | 157.67 | 278.27  | 159.92  |
| ECH_0376 | fumarate hydratase, class II;                                         | 1640.8  | 1808.9 | 802.886 | 1825.7  |
| ECH_0377 | conserved domain protein;                                             | 2827.77 | 4400.8 | 2916.53 | 5865.3  |
| ECH_0378 | carbamoyl-phosphate synthase, large subunit;                          | 261.525 | 317.05 | 384.462 | 273.57  |
| ECH_0379 | hypothetical protein;                                                 | 478.807 | 462.18 | 300.207 | 699.23  |
| ECH_0381 | dihydropteroate synthase;                                             | 137.508 | 130.98 | 445.132 | 134.31  |
| ECH_0382 | conserved hypothetical protein;                                       | 146.964 |        |         | 59.521  |
| ECH_0383 | type I secretion system ATPase;                                       | 436.585 | 484.09 | 780.897 | 594.93  |



|          |                                              |         |        |         |        |
|----------|----------------------------------------------|---------|--------|---------|--------|
| ECH_0385 | quinone oxidoreductase;                      | 1659.16 | 556.73 | 663.566 | 718.64 |
| ECH_0387 | ATP-dependent DNA helicase, UvrD/Rep family; | 31.5915 | 31.612 | 137.761 | 41.967 |
| ECH_0388 | hypothetical protein;                        | 773.866 | 1018.3 | 843.564 | 998.65 |
| ECH_0389 | ankyrin repeat protein;                      | 672.48  | 296.13 | 627.094 | 346.53 |
| ECH_0390 | SPFH domain /band 7 family protein;          | 185.768 | 168.7  | 256.378 | 222.5  |
| ECH_0392 | ATPase, AFG1 family;                         | 845.826 | 159.16 | 459.501 | 152.07 |
| ECH_0395 | ferrochelatase;                              | 478.858 | 396.51 | 576.762 | 454.59 |
| ECH_0396 | hypothetical protein;                        | 1773    | 1500.6 | 1873.31 | 1866   |
| ECH_0397 | conserved hypothetical protein;              | 2393.44 | 1433.8 | 1370.71 | 2040.1 |
| ECH_0398 | conserved hypothetical protein;              | 81.2633 | 126.76 |         | 104.14 |
| ECH_0399 | conserved hypothetical protein;              | 51.9351 |        |         | 62.269 |
| ECH_0400 | integration host factor, beta subunit;       | 248.431 | 115.98 |         | 94.833 |
| ECH_0401 | signal peptide peptidase SppA;               | 1207.71 | 1143   | 492.508 | 1076   |
| ECH_0402 | putative ribosomal protein S1;               | 2522.84 | 2899.6 | 1807.28 | 2834.7 |
| ECH_0403 | cytidylate kinase;                           | 105.722 | 121.4  | 171.318 | 105.88 |
| ECH_0404 | RNA methyltransferase, TrmH family, group 3; | 156.745 | 150.37 | 161.957 | 139.25 |
| ECH_0408 | ribosomal protein S10;                       | 1455.28 | 2048.7 | 910.121 | 2106.2 |
| ECH_0409 | ribosomal protein L3;                        | 2484.01 | 3059.6 | 1515.19 | 3167.1 |
| ECH_0410 | ribosomal protein L4;                        | 1727.63 | 1957.8 | 1549.39 | 2006.1 |
| ECH_0411 | ribosomal protein L23;                       | 2660.02 | 1584.7 | 2178.82 | 1889.3 |
| ECH_0412 | ribosomal protein L2;                        | 2554.93 | 3853.3 | 1432.54 | 3783.1 |
| ECH_0413 | ribosomal protein S19;                       | 1811.91 | 1566.2 | 734.158 | 1736.9 |
| ECH_0414 | ribosomal protein L22;                       | 1225.24 | 1749.9 | 1146.3  | 1907.3 |
| ECH_0415 | ribosomal protein S3;                        | 972.467 | 1473.5 | 1159.68 | 1573.4 |
| ECH_0416 | ribosomal protein L16;                       | 855.402 | 1282.3 | 739.852 | 1485.1 |
| ECH_0418 | ribosomal protein S17;                       | 518.451 | 1013.3 | 737.781 | 1260.3 |
| ECH_0419 | ribosomal protein L14;                       | 643.995 | 1159.8 | 1725.27 | 1322.8 |
| ECH_0420 | ribosomal protein L24;                       | 395.179 | 612.96 | 470.529 | 775.07 |
| ECH_0421 | ribosomal protein L5;                        | 2559.22 | 2828.8 | 1768.89 | 3208.6 |
| ECH_0422 | ribosomal protein S14p;                      | 1874.16 | 1792.1 | 634.291 | 2173.4 |
| ECH_0423 | ribosomal protein S8;                        | 1955.3  | 2127.8 | 1070.19 | 2299.3 |
| ECH_0424 | ribosomal protein L6;                        | 1840.53 | 1802.2 | 746.975 | 2175.2 |
| ECH_0425 | ribosomal protein L18;                       | 1860.72 | 2056   | 1237.39 | 2584.5 |
| ECH_0426 | ribosomal protein S5;                        | 2295.14 | 2327.6 | 1786.89 | 2663.9 |

|          |                                                                |         |        |         |        |
|----------|----------------------------------------------------------------|---------|--------|---------|--------|
| ECH_0427 | ribosomal protein L15;                                         | 1585.16 | 1314   | 728.021 | 1525.2 |
| ECH_0428 | preprotein translocase, SecY subunit;                          | 979.56  | 805.02 | 425.038 | 845.42 |
| ECH_0429 | adenylate kinase;                                              | 870.263 | 1003.1 | 874.293 | 913.7  |
| ECH_0430 | ribosomal protein S13;                                         | 7384.34 | 5577.2 | 4974.07 | 5379.8 |
| ECH_0431 | ribosomal protein S11;                                         | 4707.86 | 6278.4 | 3820.73 | 5717.4 |
| ECH_0432 | DNA-directed RNA polymerase, alpha subunit;                    | 7468.67 | 4811.2 | 5624.79 | 5015.3 |
| ECH_0433 | ribosomal protein L17;                                         | 3003.07 | 2418.9 | 2961.29 | 2821.1 |
| ECH_0434 | phenylalanyl-tRNA synthetase, beta subunit;                    | 913.41  | 986.68 | 983.995 | 977.33 |
| ECH_0435 | ComEC/Rec2-related protein;                                    | 45.9458 | 56.36  | 223.646 | 49.845 |
| ECH_0438 | sodium:alanine symporter family protein;                       | 1049.56 | 755.81 | 798.186 | 892.61 |
| ECH_0439 | hypothetical protein;                                          | 643.995 | 768.08 | 880.608 | 1314.2 |
| ECH_0441 | 4-hydroxybenzoate octaprenyltransferase;                       | 279.455 | 218.2  | 258.495 | 248.92 |
| ECH_0442 | putative flavin reductase;                                     | 2582.14 | 2504.3 | 1006.41 | 3232.1 |
| ECH_0443 | dihydrodipicolinate reductase;                                 | 3714.48 | 3728.8 | 2076.12 | 5239.2 |
| ECH_0444 | phosphate ABC transporter, ATP-binding protein;                | 3422.81 | 2906.6 | 1927.35 | 3382.1 |
| ECH_0445 | queuine tRNA-ribosyltransferase;                               | 83.8824 | 123.87 | 239.018 | 118.08 |
| ECH_0446 | ribosomal protein L32;                                         | 1869.66 | 2748.7 | 1182.65 | 2698.8 |
| ECH_0447 | fatty acid/phospholipid synthesis protein PlsX;                | 1810.29 | 1849.3 | 906.023 | 1870.9 |
| ECH_0448 | 3-oxoacyl-(acyl-carrier-protein) synthase III;                 | 397.995 | 606.99 | 411.1   | 594.17 |
| ECH_0449 | cytidine and deoxycytidylate deaminase family protein;         | 243.391 | 173.29 |         | 154.13 |
| ECH_0450 | conserved hypothetical protein;                                | 1261.59 | 904.08 | 3709.94 | 1293   |
| ECH_0451 | replicative DNA helicase;                                      | 313.472 | 314.35 | 502.763 | 384.77 |
| ECH_0452 | FAD-dependent oxidoreductase;                                  | 124.598 | 129.82 | 473.842 | 162.57 |
| ECH_0454 | conserved hypothetical protein;                                | 98.1597 | 55.121 |         | 70.563 |
| ECH_0455 | putative geranyltranstransferase;                              | 367.085 | 325.45 | 249.456 | 299.31 |
| ECH_0459 | ribonucleoside-diphosphate reductase, alpha subunit;           | 260.606 | 383.5  | 535.529 | 376.62 |
| ECH_0460 | conserved hypothetical protein TIGR00250;                      | 64.7665 | 106.38 | 686.812 | 78.68  |
| ECH_0461 | adenylosuccinate synthetase;                                   | 1403.16 | 1276.6 | 820.605 | 1415.5 |
| ECH_0462 | OmpA family protein;                                           | 3901.23 | 3708   | 2352.64 | 3850.9 |
| ECH_0464 | putative carboxypeptidase;                                     | 656.792 | 664.66 | 646.977 | 602.7  |
| ECH_0465 | transketolase;                                                 | 373.273 | 516.11 | 470.942 | 456.1  |
| ECH_0466 | monovalent cation/proton antiporter, MrpF/PhaF subunit family; | 432.501 | 252.24 | 711.884 | 386.51 |

|          |                                                                |         |        |         |        |
|----------|----------------------------------------------------------------|---------|--------|---------|--------|
| ECH_0467 | monovalent cation/proton antiporter, MnhG/PhaG subunit family; | 1095.64 | 751.58 | 603.845 | 1074.1 |
| ECH_0469 | Na(+)/H(+) antiporter subunit C;                               | 137.025 | 52.469 |         | 95.547 |
| ECH_0470 | ribonuclease, Rne/Rng family;                                  | 1220.54 | 1056.3 | 598.126 | 1054.6 |
| ECH_0471 | chaperone protein DnaK;                                        | 2933.79 | 2944.6 | 1858.19 | 3820.9 |
| ECH_0472 | hypothetical protein;                                          | 768.274 | 982.86 | 623.015 | 1275.6 |
| ECH_0473 | aromatic-rich protein family;                                  | 793.453 | 306.14 | 445.231 | 548.06 |
| ECH_0474 | NADH-ubiquinone/plastoquinone oxidoreductase family protein;   | 127.584 | 75.864 | 264.487 | 94.101 |
| ECH_0475 | signal recognition particle protein;                           | 979.813 | 899.63 | 444.765 | 1013.8 |
| ECH_0476 | GTP-binding protein Era;                                       | 756.634 | 700.85 | 479.242 | 675.77 |
| ECH_0477 | conserved hypothetical protein;                                | 520.39  | 513.25 | 414.128 | 601.62 |
| ECH_0478 | conserved hypothetical protein;                                | 236.575 | 207.39 | 398.907 | 243.23 |
| ECH_0479 | metallopeptidase, M24 family;                                  | 276.756 | 273.25 | 577.591 | 276.14 |
| ECH_0480 | uroporphyrinogen-III synthase;                                 | 319.789 | 92.24  | 103.141 | 53.612 |
| ECH_0482 | putative lipoprotein;                                          | 60.2278 | 67.568 | 418.047 | 70.529 |
| ECH_0483 | primosomal protein N';                                         | 158.096 | 146.43 | 77.885  | 130.54 |
| ECH_0484 | 50S ribosomal protein L28;                                     | 7585.98 | 4697.6 | 4206.42 | 4963.9 |
| ECH_0485 | diaminopimelate decarboxylase;                                 | 537.509 | 172.79 | 194.657 | 223.96 |
| ECH_0486 | ribosomal large subunit pseudouridine synthase, RluA family;   | 64.6802 | 64.97  | 108.468 | 51.921 |
| ECH_0487 | propionyl-CoA carboxylase, alpha subunit;                      | 872.679 | 823.68 | 611.472 | 714.35 |
| ECH_0488 | hypothetical protein;                                          | 314.965 | 311.33 | 683.026 | 292.13 |
| ECH_0489 | hypothetical protein;                                          | 504.506 | 527.5  | 573.511 | 447.79 |
| ECH_0490 | lipoic acid synthetase;                                        | 2252.9  | 1956.4 | 1027.64 | 1846.9 |
| ECH_0492 | putative phosphate ABC transporter, permease protein;          | 118.991 | 116.26 | 188.638 | 110.46 |
| ECH_0493 | superoxide dismutase, Fe;                                      | 1147.64 | 1052.5 | 565.32  | 1375.4 |
| ECH_0494 | type IV secretion system protein VirB3;                        | 2326.51 | 785.85 | 1034.28 | 823.25 |
| ECH_0495 | type IV secretion system protein VirB4;                        | 942.62  | 1492   | 516.935 | 1034.9 |
| ECH_0496 | type IV secretion system protein VirB6;                        | 1059.05 | 737.89 | 435.49  | 504.87 |
| ECH_0497 | type IV secretion system protein, VirB6 family;                | 303.783 | 259.7  | 235.987 | 229.5  |
| ECH_0498 | type IV secretion system protein, VirB6 family;                | 1154.89 | 553.31 | 490.334 | 483.78 |
| ECH_0499 | type IV secretion system protein, VirB6 family;                | 1129.9  | 276.45 | 558.103 | 224.67 |
| ECH_0500 | conserved hypothetical protein;                                | 39.4023 | 30.929 |         | 25.102 |
| ECH_0501 | deoxyuridine 5'triphosphate nucleotidohydrolase;               | 754.478 | 576.95 | 525.323 | 721.97 |

|          |                                                              |         |        |          |        |
|----------|--------------------------------------------------------------|---------|--------|----------|--------|
| ECH_0502 | hydroxymethylbutenyl pyrophosphate reductase;                | 437.715 | 400.15 | 350.446  | 404.88 |
| ECH_0503 | carbamoyl-phosphate synthase, small subunit;                 | 440.765 | 444.82 | 446.391  | 364.62 |
| ECH_0504 | GTP-binding protein EngA;                                    | 859.313 | 288.6  | 623.123  | 222.43 |
| ECH_0505 | 2,3-bisphosphoglycerate-independent phosphoglycerate mutase; | 80.0098 | 103.51 | 158.952  | 106.98 |
| ECH_0508 | PQQ enzyme repeat family protein;                            | 1715.41 | 1620.4 | 1081.1   | 1880.8 |
| ECH_0509 | dihydrolipoamide dehydrogenase;                              | 1153.25 | 1257.2 | 673.934  | 1673.2 |
| ECH_0510 | efflux transporter, RND family, MFP subunit;                 | 807.236 | 935.63 | 762.916  | 1116   |
| ECH_0511 | translation initiation factor IF-1;                          | 1402.74 | 1404.9 | 987.354  | 1828.1 |
| ECH_0512 | maf protein;                                                 | 555.834 | 812.49 | 1083.88  | 1077.6 |
| ECH_0514 | ribosomal protein S2;                                        | 1215.63 | 1138.7 | 776.074  | 1639.9 |
| ECH_0515 | translation elongation factor Ts;                            | 1968.56 | 941.79 | 910.394  | 1304.4 |
| ECH_0516 | conserved hypothetical protein;                              | 170.173 | 33.23  |          | 45.13  |
| ECH_0517 | putative cation ABC transporter, permease protein;           | 503.942 | 52.239 |          | 47.571 |
| ECH_0518 | putative membrane protein;                                   | 14.7998 |        |          | 16.741 |
| ECH_0519 | hypothetical protein;                                        | 768.403 |        |          | 109.09 |
| ECH_0520 | ubiquinol-cytochrome c reductase, iron-sulfur subunit;       | 4210.67 | 4246.2 | 2821.92  | 4237.4 |
| ECH_0521 | ubiquinol-cytochrome c reductase, cytochrome b;              | 1989.54 | 1874.7 | 1044.02  | 1725.6 |
| ECH_0522 | ubiquinol-cytochrome c reductase, cytochrome c1;             | 1130.37 | 1002.4 | 886.503  | 1109   |
| ECH_0523 | conserved domain protein;                                    | 1525.68 | 159.08 | 501.737  | 141.46 |
| ECH_0525 | conserved domain protein;                                    | 1055.64 | 1240.9 | 426.791  | 1997.4 |
| ECH_0526 | conserved domain protein;                                    | 424.364 | 336.11 | 552.191  | 472.26 |
| ECH_0528 | thiamine-monophosphate kinase;                               | 38.6139 | 39.151 |          | 40.206 |
| ECH_0529 | YihY family protein;                                         | 121.096 | 88.851 | 321.528  | 92.24  |
| ECH_0531 | hypothetical protein;                                        | 1363.53 | 518.42 | 11788.09 | 402.6  |
| ECH_0532 | magnesium chelatase, subunit D/I family, ComM subfamily;     | 28.4145 | 20.373 |          | 26.854 |
| ECH_0533 | ribosomal RNA large subunit methyltransferase J;             | 342.525 | 246.85 | 323.995  | 279.84 |
| ECH_0535 | hypothetical protein;                                        | 864.581 | 788.94 | 1603.03  | 775.73 |
| ECH_0536 | putative DNA repair protein RecO;                            | 59.1424 | 34.085 |          | 40.713 |
| ECH_0537 | arginyl-tRNA synthetase;                                     | 508.417 | 527.99 | 642.866  | 500.33 |
| ECH_0538 | isoleucyl-tRNA synthetase;                                   | 729.498 | 389.44 | 355.271  | 526.34 |

|          |                                                            |         |        |         |        |
|----------|------------------------------------------------------------|---------|--------|---------|--------|
| ECH_0539 | antioxidant, AhpC/TSA family;                              | 2772.25 | 2071   | 1136.58 | 3032.4 |
| ECH_0540 | conserved hypothetical protein;                            | 1323.56 | 1490.2 | 659.453 | 1843.2 |
| ECH_0541 | 5-formyltetrahydrofolate cyclo-ligase family protein;      | 251.457 | 124.43 | 210.701 | 185.01 |
| ECH_0542 | S-adenosyl-methyltransferase MraW;                         | 332.689 | 283.34 | 578.95  | 310.34 |
| ECH_0543 | GTP-binding protein, GTP1/Obg family;                      | 202.77  | 191.38 | 252.972 | 210.05 |
| ECH_0544 | enolase;                                                   | 490.345 | 583.4  | 597.917 | 654.42 |
| ECH_0545 | ribosomal protein L21;                                     | 1199.47 | 1402.3 | 816.573 | 1624.1 |
| ECH_0546 | ribosomal protein L27;                                     | 1093.95 | 1605.5 | 1211.57 | 2019.1 |
| ECH_0548 | NADH dehydrogenase I, F subunit;                           | 617.703 | 768.17 | 740.698 | 880.36 |
| ECH_0549 | hypothetical protein;                                      | 67.4431 | 89.947 | 1089.3  | 93.244 |
| ECH_0551 | hypothetical protein;                                      | 66.2001 | 96.654 |         | 44.268 |
| ECH_0552 | NADH dehydrogenase I, J subunit;                           | 1393.72 | 667.82 | 1137.31 | 656.08 |
| ECH_0553 | NADH dehydrogenase I, K subunit;                           | 489.759 | 195.79 | 415.49  | 221.2  |
| ECH_0554 | NADH dehydrogenase I, L subunit;                           | 291.4   | 259.57 | 488.873 | 226.46 |
| ECH_0555 | NADH dehydrogenase I, M subunit;                           | 443.289 | 293.96 | 409.93  | 265.5  |
| ECH_0556 | NADH dehydrogenase I, N subunit;                           | 169.292 | 93.446 | 156.009 | 106.16 |
| ECH_0557 | 1-deoxy-D-xylulose 5-phosphate reductoisomerase;           | 331.062 | 366.04 | 484.815 | 340.36 |
| ECH_0558 | putative lipoprotein;                                      | 414.395 | 431.63 | 550.226 | 476.5  |
| ECH_0559 | 4-hydroxy-3-methylbut-2-en-1-yl diphosphate synthase;      | 624.981 | 757.39 | 489.178 | 663.64 |
| ECH_0560 | Sec-independent protein translocase protein TatC;          | 326.404 | 209.08 | 396.813 | 225.92 |
| ECH_0561 | AcrB/AcrD/AcrF family protein;                             | 248.794 | 187.13 | 331.944 | 159.23 |
| ECH_0562 | N utilization substance protein A;                         | 2359.03 | 2776.5 | 3447.21 | 2328.6 |
| ECH_0563 | translation initiation factor IF-2;                        | 837.572 | 1090.9 | 1118.52 | 875.57 |
| ECH_0564 | ribosome-binding factor A;                                 | 271.892 | 77.995 |         | 123.88 |
| ECH_0567 | ATP-dependent Clp protease, ATP-binding subunit ClpA;      | 626.561 | 566.09 | 177.386 | 534.58 |
| ECH_0568 | phage minor structural protein, N-terminal domain protein; | 65.6748 | 81.803 | 807.067 | 79.641 |
| ECH_0569 | hypothetical protein;                                      | 101.683 |        |         | 42.037 |
| ECH_0570 | hypothetical protein;                                      | 13247.1 |        | 15176   | 10916  |
| ECH_0571 | magnesium transporter;                                     | 203.589 | 183.41 | 311.455 | 147.73 |
| ECH_0573 | ATP synthase F1, beta subunit;                             | 4397.11 | 4765.4 | 1536.78 | 5403   |
| ECH_0574 | ATP synthase F1, epsilon subunit;                          | 1929.23 | 817.59 | 1203.68 | 1253.2 |

|          |                                                     |         |        |         |        |
|----------|-----------------------------------------------------|---------|--------|---------|--------|
| ECH_0575 | putative transaldolase;                             | 1205.48 | 1112.6 | 839.216 | 1489.6 |
| ECH_0576 | conserved hypothetical protein;                     | 968.155 | 875.23 | 1353.6  | 1216.9 |
| ECH_0577 | RmuC family protein;                                | 75.3683 | 48.181 |         | 73.803 |
| ECH_0579 | type IV secretion system protein VirB8;             | 171.314 | 25.55  |         | 41.741 |
| ECH_0581 | sodium:dicarboxylate symporter family protein;      | 179.086 | 106.91 | 102.424 | 122.99 |
| ECH_0584 | seryl-tRNA synthetase;                              | 120.258 | 142.69 | 227.275 | 125.88 |
| ECH_0585 | conserved domain protein;                           | 475.625 | 249.72 | 228.971 | 252.11 |
| ECH_0587 | conserved hypothetical protein;                     | 1988.81 | 1526.2 | 831.626 | 1621.6 |
| ECH_0588 | tRNA delta(2)-isopentenylpyrophosphate transferase; | 158.044 | 129.21 | 184.445 | 139    |
| ECH_0591 | coproporphyrinogen III oxidase, aerobic;            | 134.686 | 167.13 | 272.411 | 168.43 |
| ECH_0593 | conserved hypothetical protein;                     | 1082.54 | 914.15 | 1295.08 | 1176.6 |
| ECH_0594 | acetylglutamate kinase;                             | 300.787 | 346.75 | 254.504 | 390.46 |
| ECH_0595 | GTP-binding protein EngB;                           | 110.031 | 55.396 |         | 57.184 |
| ECH_0597 | peptide chain release factor 1;                     | 320.585 | 304.14 | 515.185 | 268.33 |
| ECH_0599 | propionyl-CoA carboxylase, beta subunit;            | 664.623 | 844.95 | 700.575 | 983.67 |
| ECH_0600 | hypothetical protein;                               | 74.1441 | 341.51 |         | 366.99 |
| ECH_0601 | hypothetical protein;                               | 13.5578 |        | 57.5091 | 7.1636 |
| ECH_0602 | formamidopyrimidine-DNA glycosylase;                | 84.7952 | 23.967 | 111.411 | 60.451 |
| ECH_0603 | hypothetical protein;                               | 136.405 |        |         | 163.26 |
| ECH_0605 | glutamyl-tRNA synthetase;                           | 114.123 | 102.66 | 215.659 | 144.39 |
| ECH_0607 | hypothetical protein;                               | 42.4992 | 33.515 | 106.828 | 43.016 |
| ECH_0609 | hypothetical protein;                               | 2533.67 | 2960.8 | 6776.83 | 2786.2 |
| ECH_0611 | hypothetical protein;                               | 27.6314 | 52.445 |         | 44.134 |
| ECH_0612 | hypothetical protein;                               | 799.115 | 955.99 | 711.984 | 850.53 |
| ECH_0615 | NADH dehydrogenase I, E subunit;                    | 405.057 | 450.34 | 533.223 | 456.96 |
| ECH_0616 | NADH dehydrogenase I, D subunit;                    | 1050.38 | 1099.8 | 519.99  | 911.62 |
| ECH_0617 | NADH dehydrogenase I, H subunit;                    | 974.696 | 829.54 | 785.28  | 1015.6 |
| ECH_0618 | NADH dehydrogenase I, G subunit;                    | 1393.31 | 1428.9 | 986.861 | 1382.4 |
| ECH_0619 | conserved hypothetical protein;                     | 870.577 | 1305   | 1358.95 | 1641.8 |
| ECH_0620 | DNA gyrase, B subunit;                              | 956.065 | 1008.4 | 585.707 | 1305.3 |
| ECH_0621 | aspartate carbamoyltransferase;                     | 112.699 | 97.942 | 165.339 | 112    |
| ECH_0622 | tRNA pseudouridine synthase A;                      | 33.0678 | 31.432 |         | 32.939 |
| ECH_0625 | putative lipoprotein;                               | 1142.04 | 1059.4 | 965.637 | 1318.2 |
| ECH_0626 | lysyl-tRNA synthetase;                              | 1350.98 | 1114.5 | 1453.17 | 1266.7 |

|          |                                                               |         |         |         |        |
|----------|---------------------------------------------------------------|---------|---------|---------|--------|
| ECH_0627 | conserved hypothetical protein;                               | 3437.62 | 2605.2  | 2586.12 | 2698.3 |
| ECH_0628 | rrf2/aminotransferase, class V family protein;                | 1298.89 | 1084.1  | 1207.34 | 895.51 |
| ECH_0629 | cysteine desulfurase;                                         | 1593.91 | 1441.1  | 1390.5  | 1219.5 |
| ECH_0630 | FeS cluster assembly scaffold IscU;                           | 732.67  | 1340.3  | 1687.77 | 1333.4 |
| ECH_0631 | iron-sulfur cluster assembly accessory protein;               | 745.449 | 572.61  | 568.291 | 605.82 |
| ECH_0632 | co-chaperone Hsc20;                                           | 340.09  | 152.56  | 320.574 | 97.301 |
| ECH_0633 | chaperone protein HscA;                                       | 582.869 | 497.97  | 600.216 | 382.7  |
| ECH_0634 | iron-sulfur cluster binding protein;                          | 434.544 | 438.82  | 239.621 | 373.01 |
| ECH_0635 | hypothetical protein;                                         | 171.839 | 89.85   | 216.864 | 65.996 |
| ECH_0636 | cytochrome c biogenesis family protein;                       | 52.7247 | 27.493  |         | 33.11  |
| ECH_0637 | 3-demethylubiquinone-9 3-methyltransferase;                   | 1423.36 | 1059.5  | 1265.44 | 1285   |
| ECH_0638 | ribose 5-phosphate isomerase B;                               | 3274    | 3259    | 2156.59 | 3883.1 |
| ECH_0639 | hypothetical protein;                                         | 1035.9  | 568.32  | 1698.31 | 991.69 |
| ECH_0640 | conserved domain protein;                                     | 396.771 | 497.38  | 590.148 | 545.12 |
| ECH_0641 | malate dehydrogenase, NAD-dependent;                          | 2556.66 | 3796.2  | 2513.73 | 4193   |
| ECH_0642 | dihydroneopterin aldolase;                                    | 84.7361 | 63.445  |         | 57.024 |
| ECH_0643 | RDD family protein;                                           | 525.278 | 230.39  | 308.084 | 292.2  |
| ECH_0644 | putative metalloendopeptidase, glycoprotease family;          | 1092.15 | 438.31  | 764.049 | 492.79 |
| ECH_0645 | immunogenic protein;                                          | 1031.65 | 1148    | 833.529 | 968.1  |
| ECH_0646 | triosephosphate isomerase;                                    | 1415.55 | 1581.1  | 885.902 | 1356   |
| ECH_0648 | dimethyladenosine transferase;                                | 399.456 | 138.68  | 341.331 | 113.42 |
| ECH_0649 | pyridine nucleotide-disulphide oxidoreductase family protein; | 170.222 | 185.21  | 178.125 | 200.84 |
| ECH_0650 | pmbA protein;                                                 | 601.834 | 586.9   | 485.113 | 511.25 |
| ECH_0651 | GTP cyclohydrolase I;                                         | 1527.91 | 1399.1  | 779.082 | 1181.3 |
| ECH_0652 | ATP synthase F1, gamma subunit;                               | 2852.18 | 2021.4  | 2133.65 | 1970.2 |
| ECH_0653 | ankyrin repeat protein;                                       | 410.187 | 533.34  | 790.85  | 485.7  |
| ECH_0654 | putative ribosomal subunit interface protein;                 | 299.144 | 178.08  | 261.405 | 179.27 |
| ECH_0655 | RNA polymerase sigma-32 factor;                               | 1840.66 | 2155.7  | 2763.33 | 1987.6 |
| ECH_0656 | ribosomal protein L36;                                        | 685.772 | 1388.2  | 1203.68 | 1499.9 |
| ECH_0660 | conserved hypothetical protein;                               | 267.844 | 129.309 | 23.314  | 9.069  |
| ECH_0663 | conserved hypothetical protein;                               | 25.0452 |         |         | 24.08  |
| ECH_0664 | hypothetical protein;                                         | 80.478  | 40.41   |         | 58.312 |
| ECH_0665 | phage uncharacterized protein;                                | 34.0747 | 31.587  | 307.429 | 30.593 |
| ECH_0666 | adenosylmethionine-8-amino-7-oxononanoate                     | 328.625 | 324.5   | 378.792 | 291.61 |

|          |                                                                      |         |        |         |        |
|----------|----------------------------------------------------------------------|---------|--------|---------|--------|
|          | aminotransferase;                                                    |         |        |         |        |
| ECH_0667 | proline dehydrogenase/delta-1-pyrroline-5-carboxylate dehydrogenase; | 701.08  | 1135.9 | 831.68  | 1276.2 |
| ECH_0669 | 3-oxoacyl-(acyl-carrier-protein) reductase;                          | 1230.04 | 979.01 | 991.336 | 1274.3 |
| ECH_0670 | putative membrane protein;                                           | 376.076 | 319.72 | 557.321 | 411.77 |
| ECH_0673 | putative membrane protein;                                           | 143.425 | 63.784 | 251.742 | 129.72 |
| ECH_0675 | exodeoxyribonuclease III;                                            | 699.524 | 664.65 | 497.086 | 1123.9 |
| ECH_0676 | arginine biosynthesis bifunctional protein ArgJ;                     | 5470.9  | 4988.3 | 2662.52 | 6311   |
| ECH_0678 | hypothetical protein;                                                | 37.416  | 20.084 |         | 54.142 |
| ECH_0679 | hypothetical protein;                                                | 73.8725 | 39.653 |         | 44.227 |
| ECH_0680 | argininosuccinate synthase;                                          | 734.237 | 801.49 | 667.777 | 948.72 |
| ECH_0681 | hypothetical protein;                                                | 4787.59 | 2668   | 3060.03 | 4189.6 |
| ECH_0682 | hypothetical protein;                                                | 1861.81 | 775.41 | 1883.22 | 1482.7 |
| ECH_0684 | ankyrin repeat protein;                                              | 1765.23 | 3651.1 | 1309.57 | 2321.3 |
| ECH_0685 | hypothetical protein;                                                | 1585.96 | 1311   | 2027.84 | 1008.6 |
| ECH_0688 | putative deoxyguanosinetriphosphate triphosphohydrolase;             | 452.849 | 453.84 | 465.997 | 440.44 |
| ECH_0689 | iron-sulfur cluster assembly accessory protein;                      | 17663.3 | 11067  | 8783.46 | 12757  |
| ECH_0690 | signal peptidase I;                                                  | 5614.13 | 5345.8 | 5656.48 | 5498.5 |
| ECH_0691 | NADH dehydrogenase I, I subunit;                                     | 2447.88 | 2383.4 | 2892.37 | 2089.5 |
| ECH_0692 | hypothetical protein;                                                | 68.3356 |        |         | 48.3   |
| ECH_0693 | GTP-binding protein TypA;                                            | 2009.28 | 2006.6 | 1788.39 | 2316.2 |
| ECH_0695 | hypothetical protein;                                                | 761.758 | 927.88 | 934.768 | 8.8077 |
| ECH_0696 | hypothetical protein;                                                | 390.18  | 453.15 |         | 530.86 |
| ECH_0697 | hypothetical protein;                                                | 8509.63 | 8434.7 | 7287.48 | 358.45 |
| ECH_0698 | hypothetical protein;                                                | 319.974 | 260.05 | 321.879 | 6817.1 |
| ECH_0699 | hypothetical protein;                                                | 719.648 | 714.26 | 1225.69 | 326.89 |
| ECH_0700 | hypothetical protein;                                                | 2670.86 | 1714.7 | 1072.71 | 1362.8 |
| ECH_0701 | porphobilinogen deaminase;                                           | 326.475 | 496.52 | 577.014 | 388.32 |
| ECH_0702 | folylpolyglutamate synthase;                                         | 4118.64 | 4220.8 | 4570.39 | 3853.7 |
| ECH_0703 | glutamyl-tRNA(Gln) amidotransferase, A subunit;                      | 641.251 | 662.95 | 521.471 | 545.38 |
| ECH_0704 | conserved hypothetical protein;                                      | 191.932 | 166.45 | 320.457 | 173.85 |
| ECH_0705 | peptide chain release factor 2, programmed frameshift;               | 3364.17 | 3882.4 | 2913.29 | 4150.5 |
| ECH_0707 | hypothetical protein;                                                | 6790.2  | 6074.5 | 8831.37 | 4631.6 |



|          |                                                   |         |        |         |        |
|----------|---------------------------------------------------|---------|--------|---------|--------|
| ECH_0714 | hypothetical protein;                             | 767.085 | 336.42 |         | 311.75 |
| ECH_0715 | hypothetical protein;                             | 1449.26 | 1567.2 | 1449.45 | 881.52 |
| ECH_0716 | hypothetical protein;                             | 35.23   | 33.619 |         | 28.242 |
| ECH_0720 | hypothetical protein;                             | 112.052 | 113.95 | 366.053 | 118.5  |
| ECH_0721 | putative lipoprotein;                             | 295.882 | 316.05 | 718.863 | 392.25 |
| ECH_0722 | hypothetical protein;                             | 29.2806 | 45.341 |         | 38.966 |
| ECH_0724 | GTP-binding protein LepA;                         | 599.66  | 778.65 | 878.477 | 695.94 |
| ECH_0725 | conserved hypothetical protein;                   | 648.078 | 280.11 | 520.837 | 484.67 |
| ECH_0726 | polyribonucleotide nucleotidyltransferase;        | 3812.81 | 4390.6 | 2605.77 | 4787.4 |
| ECH_0727 | ribosomal protein S15;                            | 3986.2  | 5021.1 | 3946.1  | 6005.1 |
| ECH_0728 | tRNA pseudouridine synthase B;                    | 86.448  | 136.42 | 697.08  | 99.716 |
| ECH_0730 | glycoprotease family protein;                     | 168.608 | 157.8  | 594.163 | 171.21 |
| ECH_0731 | rotamase family protein;                          | 879.921 | 641.48 | 485.657 | 712.87 |
| ECH_0732 | aspartate aminotransferase;                       | 962.679 | 834.86 | 475.639 | 1048   |
| ECH_0734 | antioxidant, AhpC/Tsa family;                     | 4875.62 | 3822.6 | 3130.2  | 4262.3 |
| ECH_0735 | thioredoxin-disulfide reductase;                  | 1143.54 | 1214.9 | 1270.97 | 1330.3 |
| ECH_0737 | pantetheine-phosphate adenylyltransferase;        | 768.751 | 415.49 | 1416.07 | 463.07 |
| ECH_0739 | conserved hypothetical protein;                   | 929.304 | 959.6  | 1335.03 | 782.69 |
| ECH_0740 | prolyl-tRNA synthetase;                           | 2035.46 | 1857.2 | 1273.66 | 1879.6 |
| ECH_0741 | holo-(acyl-carrier-protein) synthase;             | 53.3018 |        |         | 88.787 |
| ECH_0744 | conserved hypothetical protein;                   | 3042.46 | 2051.5 | 9008.54 | 2234.7 |
| ECH_0745 | conserved domain protein;                         | 546.869 | 436.65 | 2573.41 | 397.27 |
| ECH_0750 | DNA topoisomerase I;                              | 340.286 | 362.41 | 514.85  | 291.77 |
| ECH_0751 | YjeF family protein;                              | 752.216 | 846.55 | 1203.79 | 949.91 |
| ECH_0752 | hypothetical protein;                             | 503.333 | 340.22 | 992.031 | 346.58 |
| ECH_0753 | conserved hypothetical protein;                   | 1932.5  | 1587.5 | 4153.22 | 1714.8 |
| ECH_0754 | O-methyltransferase;                              | 105.15  | 77.323 |         | 70.561 |
| ECH_0755 | sensor histidine kinase/response regulator;       | 111.005 | 77.23  | 223.723 | 67.014 |
| ECH_0756 | divalent ion tolerance protein CutA1;             | 815.655 | 153.14 |         | 154.13 |
| ECH_0757 | 4-diphosphocytidyl-2C-methyl-D-erythritol kinase; | 707.831 | 666.67 | 960.178 | 910.8  |
| ECH_0758 | putative tRNA-dihydrouridine synthase;            | 74.344  | 126.44 | 732.427 | 101.65 |
| ECH_0760 | RNA polymerase sigma factor RpoD;                 | 2041.42 | 1939.7 | 1329.26 | 1807.1 |
| ECH_0761 | DNA primase;                                      | 134.657 | 119.2  | 347.837 | 117.68 |
| ECH_0762 | conserved hypothetical protein;                   | 121.808 | 138.08 | 365.85  | 128.05 |

|          |                                                                |         |        |         |        |
|----------|----------------------------------------------------------------|---------|--------|---------|--------|
| ECH_0763 | conserved domain protein;                                      | 1802.43 | 1302.4 | 2715.22 | 1330.2 |
| ECH_0764 | conserved hypothetical protein;                                | 966.551 | 907.48 | 1421.93 | 798.26 |
| ECH_0765 | hypothetical protein;                                          | 190.656 |        |         | 60.002 |
| ECH_0766 | ribonucleoside-diphosphate reductase, beta subunit;            | 1189.7  | 947.86 | 1008.62 | 1098.2 |
| ECH_0767 | conserved hypothetical protein;                                | 92.7738 | 97.959 | 284.309 | 84.855 |
| ECH_0768 | cysteinyl-tRNA synthetase;                                     | 634.416 | 642.79 | 595.406 | 701.12 |
| ECH_0769 | exopolysaccharide synthesis protein;                           | 1278.31 | 905.78 | 564.821 | 942.11 |
| ECH_0771 | NAD-glutamate dehydrogenase family protein;                    | 250.678 | 257.16 | 341.732 | 248.12 |
| ECH_0772 | hypothetical protein;                                          | 113.582 | 131.61 |         | 79.644 |
| ECH_0773 | putative response regulator/diguanylate cyclase;               | 164.488 | 241.91 | 202.033 | 202.25 |
| ECH_0774 | ribosomal large subunit pseudouridine synthase C;              | 112.248 | 89.373 | 350.096 | 118.25 |
| ECH_0776 | putative inositol monophosphatase;                             | 287.411 | 261.32 | 510.54  | 259.38 |
| ECH_0777 | translation elongation factor P;                               | 1768.76 | 2620.8 | 2054.44 | 2707.3 |
| ECH_0778 | conserved hypothetical protein;                                | 67.5346 | 70.976 | 293.129 | 59.022 |
| ECH_0779 | phosphatidylserine decarboxylase;                              | 3257.68 | 3466.3 | 2071.09 | 3299.8 |
| ECH_0780 | putative CDP-diacylglycerol--serine O-phosphatidyltransferase; | 700.791 | 497.97 | 349.717 | 602.51 |
| ECH_0781 | sodium:alanine symporter family protein;                       | 156.054 | 157.67 | 271.328 | 133.69 |
| ECH_0782 | inner-membrane protein, 60 kDa;                                | 522.004 | 390.88 | 494.528 | 338.53 |
| ECH_0783 | 6,7-dimethyl-8-ribityllumazine synthase;                       | 1315.1  | 1441.3 | 833.881 | 1555.9 |
| ECH_0784 | putative N utilization substance protein B;                    | 772.794 | 406.5  | 271.114 | 455.36 |
| ECH_0785 | excinuclease ABC, A subunit;                                   | 265.307 | 288.07 | 302.64  | 228.71 |
| ECH_0786 | NADH dehydrogenase I, A subunit;                               | 2412.93 | 1164.8 | 1739.19 | 1299.7 |
| ECH_0787 | NADH dehydrogenase I, B subunit;                               | 1004.12 | 979.42 | 814.712 | 1175.5 |
| ECH_0788 | NADH dehydrogenase I, C subunit;                               | 524.223 | 238.78 | 368.743 | 317.4  |
| ECH_0789 | cytochrome c-type biogenesis protein CcmE;                     | 1154.93 | 363.81 | 531.101 | 290.52 |
| ECH_0790 | orotidine 5'-phosphate decarboxylase                           | 293.752 |        |         | 230.47 |
| ECH_0791 | acid phosphatase SurE;                                         | 723.06  | 1020.5 | 839.14  | 1167.2 |
| ECH_0792 | orotidine 5'-phosphate decarboxylase;                          | 346.249 | 493.27 | 734.356 | 596.42 |
| ECH_0793 | hydrolase, TatD family;                                        | 474.328 | 527.34 | 743.652 | 468.98 |
| ECH_0794 | leucyl-tRNA synthetase;                                        | 1593.43 | 306.81 | 582.019 | 393.16 |
| ECH_0795 | conserved hypothetical protein;                                | 382.479 | 629.93 | 534.201 | 567.45 |
| ECH_0796 | DNA-directed RNA polymerase, omega subunit;                    | 1671.56 | 1473   | 1380.84 | 1859.6 |
| ECH_0797 | Smr domain protein;                                            | 94.9937 | 107.44 |         | 85.991 |

|          |                                                           |         |        |         |        |
|----------|-----------------------------------------------------------|---------|--------|---------|--------|
| ECH_0798 | thiamin biosynthesis protein ThiC;                        | 1111.65 | 1134.6 | 796.578 | 1351   |
| ECH_0801 | dephospho-CoA kinase;                                     | 115.208 | 118.84 |         | 94.91  |
| ECH_0802 | Sua5/YciO/YrdC/YwIC family protein;                       | 48.2344 | 77.72  | 199.07  | 83.334 |
| ECH_0803 | conserved hypothetical protein;                           | 41.223  | 50.155 |         | 57.28  |
| ECH_0804 | DNA-binding protein HU;                                   | 3113.23 | 3425   | 1292.5  | 4204.7 |
| ECH_0805 | pyridoxal phosphate biosynthesis protein PdxJ;            | 2245.51 | 1909.9 | 1473.67 | 2163.6 |
| ECH_0806 | nicotinate (nicotinamide) nucleotide adenylyltransferase; | 224.461 | 235.26 | 676.802 | 231.9  |
| ECH_0807 | hypothetical protein;                                     | 600.994 | 620.43 | 759.635 | 746.94 |
| ECH_0809 | chromosomal replication initiator protein DnaA;           | 1386.94 | 1320.3 | 904.376 | 1511.7 |
| ECH_0810 | hypothetical protein;                                     | 403.013 | 324.38 |         | 326.53 |
| ECH_0811 | enoyl-(acyl-carrier-protein) reductase;                   | 3875.96 | 4025.4 | 2164.67 | 4335.4 |
| ECH_0813 | glutamyl-tRNA(Gln) amidotransferase, B subunit;           | 1419.24 | 1520.8 | 917.222 | 1715.3 |
| ECH_0814 | putative malonyl-CoA decarboxylase;                       | 609.989 | 445.03 | 395.532 | 607.69 |
| ECH_0815 | single-strand binding protein;                            | 473.021 | 356.27 | 409.479 | 467.42 |
| ECH_0816 | major facilitator family transporter;                     | 309.874 | 252.85 | 550.954 | 255.66 |
| ECH_0818 | major facilitator family transporter;                     | 373.944 | 274.18 | 1222.38 | 229.98 |
| ECH_0820 | conserved hypothetical protein;                           | 409.514 | 65.915 | 167.342 | 73.542 |
| ECH_0821 | delta-aminolevulinic acid dehydratase;                    | 305.51  | 373.57 | 220.856 | 355.89 |
| ECH_0822 | glutamine-dependent NAD(+) synthetase;                    | 62.2961 | 45.232 |         | 38.903 |
| ECH_0824 | DNA mismatch repair protein MutS;                         | 309.471 | 314.29 | 573.305 | 312.34 |
| ECH_0825 | hypothetical protein;                                     | 3431.48 | 3640.1 | 3435.83 | 1904.1 |
| ECH_0826 | HIT family protein;                                       | 1512.21 | 1477.7 | 1622.05 | 921.42 |
| ECH_0828 | dihydrodipicolinate synthase;                             | 2806.53 | 2652.9 | 940.794 | 2829   |
| ECH_0829 | hypothetical protein;                                     | 104.999 |        |         | 272.85 |
| ECH_0830 | phage major capsid protein, HK97 family;                  | 397.034 | 123.75 | 202.18  | 242.55 |
| ECH_0832 | 2-oxoglutarate dehydrogenase, E1 component;               | 1303.06 | 1436.4 | 1188.13 | 1122.8 |
| ECH_0833 | hypothetical protein;                                     | 907.175 | 151.61 |         | 235.73 |
| ECH_0834 | conserved hypothetical protein;                           | 747.373 | 525.8  | 1250.82 | 703.29 |
| ECH_0835 | conserved hypothetical protein;                           | 33.6452 | 28.428 |         | 27.848 |
| ECH_0836 | hypothetical protein;                                     | 31.9347 | 26.761 | 208.123 | 28.156 |
| ECH_0837 | tRNA-i(6)A37 modification enzyme MiaB;                    | 565.8   | 566.22 | 662.068 | 455.64 |
| ECH_0838 | conserved hypothetical protein;                           | 24.419  | 26.663 | 254.966 | 26.358 |
| ECH_0840 | 2-polyprenylphenol 6-hydroxylase;                         | 935.55  | 235.34 | 295.915 | 257.82 |
| ECH_0841 | putative cation ABC transporter, ATP-binding              | 288.731 | 123.46 | 319.495 | 155.31 |

|          |                                                                      |         |         |         |        |
|----------|----------------------------------------------------------------------|---------|---------|---------|--------|
|          | protein;                                                             |         |         |         |        |
| ECH_0842 | putative cation ABC transporter, periplasmic cation-binding protein; | 324.273 | 242.62  |         | 206.11 |
| ECH_0843 | recombination protein RecR;                                          | 894.917 | 1095.1  | 693.19  | 1313.1 |
| ECH_0844 | twin-arginine translocation protein, TatA;                           | 735.866 | 1215.5  | 718.863 | 1632.9 |
| ECH_0845 | ABC transporter, ATP-binding protein;                                | 579.983 | 633.1   | 714.647 | 629.32 |
| ECH_0846 | conserved hypothetical protein;                                      | 168.487 | 165.44  | 150.46  | 192.54 |
| ECH_0847 | glutathione S-transferase family protein;                            | 577.122 | 401.24  | 262.288 | 412.41 |
| ECH_0848 | biotin--acetyl-CoA-carboxylase ligase;                               | 1015.07 | 253.6   | 299.526 | 231.38 |
| ECH_0849 | hypothetical protein;                                                | 1439.25 | 1435.2  | 1064.19 | 899.68 |
| ECH_0852 | adenylosuccinate lyase;                                              | 177.3   | 148.57  | 348.64  | 157.44 |
| ECH_0853 | chaperone protein HtpG;                                              | 1637.61 | 1538.2  | 1152.66 | 1871.5 |
| ECH_0854 | conserved hypothetical protein;                                      | 816.143 | 978.34  | 942.089 | 1130.3 |
| ECH_0856 | endonuclease III;                                                    | 88.4203 | 193.49  |         | 58.877 |
| ECH_0857 | endonuclease III;                                                    | 638.628 | 311.1   | 245.299 | 252.96 |
| ECH_0858 | DNA gyrase, A subunit;                                               | 3263.43 |         | 2007.86 | 3483.8 |
| ECH_0860 | helicase, UvrD/Rep family;                                           | 157.689 | 185.58  | 370.664 | 156.71 |
| ECH_0862 | hypothetical protein;                                                | 4653.15 | 4549.8  | 3635.24 | 3626.2 |
| ECH_0864 | conserved domain protein;                                            | 455.888 | 246.1   | 273.646 | 252.46 |
| ECH_0865 | hypothetical protein;                                                | 24.3302 | 24.498  | 476.87  | 24.49  |
| ECH_0866 | hypothetical protein;                                                | 25.344  | 47.655  | 299.707 | 36.122 |
| ECH_0871 | putative twitching motility protein PilT;                            | 549.03  | 278.18  | 740.131 | 344.29 |
| ECH_0872 | tRNA (5-methylaminomethyl-2-thiouridylate)-methyltransferase;        | 264.57  | 271.47  | 480.545 | 246.58 |
| ECH_0873 | Coq7 family protein;                                                 | 655.59  | 567.94  | 403.572 | 625.55 |
| ECH_0874 | disulfide bond formation family protein;                             | 321.783 | 185.97  | 382.181 | 186.05 |
| ECH_0875 | putative phosphatidylglycerophosphatase A;                           | 434.506 | 258.88  | 266.011 | 266.66 |
| ECH_0876 | ribosomal protein L33;                                               | 8272.92 | 2799.9  | 3556.48 | 3384.4 |
| ECH_0877 | ankyrin repeat protein;                                              | 1372.73 | 1538.7  | 1427.05 | 1697.1 |
| ECH_0878 | hypothetical protein;                                                | 217.54  | 55.823  | 1125.63 | 45.327 |
| ECH_0879 | hypothetical protein;                                                | 520.531 | 153.565 | 240.502 | 129.2  |
| ECH_0880 | hypothetical protein;                                                | 378.914 |         |         | 100.96 |
| ECH_0881 | acyl carrier protein;                                                | 1066.57 | 907.7   | 867.324 | 1171.6 |
| ECH_0882 | 3-oxoacyl-(acyl-carrier-protein) synthase II;                        | 694.716 | 608.35  | 841.223 | 735.95 |
| ECH_0884 | DNA mismatch repair protein, MutL/HexB family;                       | 362.832 | 385.93  | 431.958 | 343.09 |

|          |                                                                        |         |         |         |        |
|----------|------------------------------------------------------------------------|---------|---------|---------|--------|
| ECH_0885 | sensor histidine kinase;                                               | 164.615 | 153     | 279.304 | 132.72 |
| ECH_0886 | acetylmethionine/succinylmethionine aminotransferase;                  | 3243.91 | 3256.6  | 2244.39 | 3224.4 |
| ECH_0888 | putative membrane protein;                                             | 2867.5  | 3142.3  | 7373.05 | 2554.5 |
| ECH_0890 | putative cell division protein FtsK;                                   | 429.207 | 491.21  | 856.906 | 490.46 |
| ECH_0891 | YGGT family protein;                                                   | 66.897  | 35.813  |         | 84.368 |
| ECH_0892 | CBS domain protein;                                                    | 138.819 | 125.43  | 124.228 | 117.81 |
| ECH_0893 | thiamine-phosphate pyrophosphorylase;                                  | 73.6686 | 73.22   | 724.111 | 64.08  |
| ECH_0895 | conserved hypothetical protein;                                        | 847.052 | 669.38  |         | 727.92 |
| ECH_0896 | rhodanese domain protein;                                              | 2973.13 | 2324.2  | 1859.67 | 2606.4 |
| ECH_0897 | methionyl-tRNA formyltransferase;                                      | 356.226 | 254.35  | 312.138 | 305.73 |
| ECH_0899 | ATP-dependent protease La;                                             | 1450.54 | 1481.8  | 856.728 | 1440   |
| ECH_0900 | ATP-dependent Clp protease, ATP-binding subunit ClpX;                  | 1748.85 | 1962.9  | 921.982 | 2005.2 |
| ECH_0901 | ATP-dependent Clp protease, proteolytic subunit ClpP;                  | 2516.66 | 2817.7  | 1024.38 | 3059.6 |
| ECH_0902 | trigger factor;                                                        | 1306.86 | 1174.6  | 1225.34 | 1104.5 |
| ECH_0905 | phosphatidylglycerophosphatase A;                                      | 567.08  | 717.41  | 957.067 | 726.37 |
| ECH_0906 | acetyltransferase, GNAT family;                                        | 425.747 | 338.21  | 447.098 | 277.21 |
| ECH_0907 | conserved hypothetical protein;                                        | 433.219 | 277.72  | 485.515 | 307.29 |
| ECH_0908 | conserved hypothetical protein;                                        | 956.127 | 2160.4  | 1480.64 | 2473   |
| ECH_0909 | hypothetical protein;                                                  | 59.1992 |         | 329.164 | 19.304 |
| ECH_0910 | conserved hypothetical protein;                                        | 397.368 | 238.48  | 3070.22 | 298.71 |
| ECH_0912 | ribosomal protein S4;                                                  | 5230.68 | 4561.7  |         | 4996.6 |
| ECH_0913 | conserved hypothetical protein;                                        | 570.646 | 114.369 |         | 51.68  |
| ECH_0914 | phosphomethylpyrimidine kinase;                                        | 103.566 | 135.17  | 231.634 | 119.56 |
| ECH_0916 | hypothetical protein;                                                  | 483.66  | 667.07  | 1173.06 | 483.43 |
| ECH_0917 | putative succinate dehydrogenase, hydrophobic membrane anchor protein; | 23.4983 | 33.788  |         | 37.932 |
| ECH_0918 | succinate dehydrogenase, cytochrome b556 subunit;                      | 490.681 | 249.35  | 334.355 | 285.4  |
| ECH_0920 | putative 3-phosphoshikimate 1-carboxyvinyltransferase;                 | 65.7742 | 57.677  | 246.324 | 76.528 |
| ECH_0921 | hypothetical protein;                                                  | 81.5385 |         |         | 85.999 |
| ECH_0922 | DNA polymerase III, alpha subunit;                                     | 413.4   | 493.05  | 459.79  | 503.81 |
| ECH_0925 | hypothetical protein;                                                  | 67.7889 |         |         | 56.761 |
| ECH_0928 | hypothetical protein;                                                  | 140.484 |         |         | 59.684 |

|          |                                                                |         |        |         |         |
|----------|----------------------------------------------------------------|---------|--------|---------|---------|
| ECH_0929 | putative lipoprotein;                                          | 2898.72 | 3375   | 3191.44 | 3751.8  |
| ECH_0930 | putative bolA protein;                                         | 1643.18 | 251.9  | 1245.04 | 309.18  |
| ECH_0931 | pyridoxamine 5'-phosphate oxidase;                             | 191.927 | 287.64 | 560.713 | 284.16  |
| ECH_0935 | phospholipase/carboxylesterase family protein;                 | 381.313 | 354.1  | 372.868 | 452.22  |
| ECH_0936 | hypothetical protein;                                          | 111.852 |        |         | 127.71  |
| ECH_0937 | argininosuccinate lyase;                                       | 521.299 | 284.55 | 357.142 | 279.33  |
| ECH_0938 | hypothetical protein;                                          | 78.218  |        |         | 68.175  |
| ECH_0939 | putative polypeptide deformylase;                              | 752.32  | 1184.8 | 276.486 | 1474.2  |
| ECH_0940 | dihydroorotate dehydrogenase;                                  | 1002.35 | 751.64 | 1259.55 | 682.34  |
| ECH_0941 | putative transcriptional activator, Baf family;                | 489.623 | 465.74 | 797.183 | 397.63  |
| ECH_0943 | hypothetical protein;                                          | 164.223 | 67.059 | 171.764 | 56.536  |
| ECH_0944 | Na <sup>+</sup> /H <sup>+</sup> ion antiporter family protein; | 62.0021 | 66.007 |         | 70.757  |
| ECH_0945 | conserved domain protein;                                      | 122.585 | 134.71 | 581.481 | 150.53  |
| ECH_0946 | ribonuclease HII;                                              | 106.525 | 128.14 | 410.779 | 126.98  |
| ECH_0947 | conserved hypothetical protein;                                | 128.019 | 220.29 | 961.932 | 224.47  |
| ECH_0950 | 8-amino-7-oxononanoate synthase;                               | 119.506 | 184.9  | 175.809 | 209.42  |
| ECH_0951 | DNA-directed RNA polymerase, beta' subunit;                    | 1387.07 | 1895.4 | 813.115 | 1937.2  |
| ECH_0952 | DNA-directed RNA polymerase, beta subunit;                     | 1454.93 | 1877.5 | 877.628 | 1917.5  |
| ECH_0953 | ribosomal protein L7/L12;                                      | 2914.59 | 2155.8 | 1480.64 | 2384    |
| ECH_0954 | ribosomal protein L10;                                         | 929.992 | 678.14 | 602.774 | 755.35  |
| ECH_0955 | ribosomal protein L1;                                          | 1088.15 | 1275   | 917.283 | 1222.7  |
| ECH_0956 | ribosomal protein L11;                                         | 760.908 | 1276.9 | 874.293 | 1120.9  |
| ECH_0957 | transcription antitermination protein NusG;                    | 1077.56 | 1197.6 | 1138.2  | 1206.5  |
| ECH_0958 | putative preprotein translocase, SecE subunit;                 | 477.604 | 323.35 | 392.107 | 482.42  |
| ECH_0961 | translation elongation factor G;                               | 3746.54 | 4763.4 | 2069.2  | 4769.9  |
| ECH_0962 | ribosomal protein S7;                                          | 3014.19 | 3529   | 1647.58 | 3218.1  |
| ECH_0963 | ribosomal protein S12;                                         | 8960.85 | 5654.6 | 3860.99 | 5383.9  |
| ECH_0964 | serine/threonine phosphoprotein phosphatase;                   | 1281.07 | 1599.6 | 557.77  | 1377.1  |
| ECH_0965 | hypothetical protein;                                          | 1079.14 | 859.65 | 412.289 | 793.23  |
| ECH_0966 | metallo-beta-lactamase family, beta-CASP subfamily;            | 819.951 | 772.94 | 725.507 | 799.65  |
| ECH_0967 | conserved hypothetical protein;                                | 161.553 | 59.257 |         | 35.19   |
| ECH_0970 | type I secretion membrane fusion protein, HlyD family;         | 473.752 | 482.89 | 247.155 | 388.08  |
| ECH_0971 | hypothetical protein;                                          | 383.624 | 157.46 |         | 234.6   |
| ECH_0972 | ABC transporter, permease protein;                             | 523.992 | 284.65 | 194.176 | 309.585 |

|          |                                                                            |         |        |         |        |
|----------|----------------------------------------------------------------------------|---------|--------|---------|--------|
| ECH_0973 | cytochrome b561 family protein;                                            | 1240.31 | 1565.2 | 1030.9  | 1487.5 |
| ECH_0974 | trans-2-enoyl-ACP reductase II;                                            | 616.947 | 675.3  | 568.499 | 681.21 |
| ECH_0976 | major antigenic protein;                                                   | 1469.72 | 800.26 | 649.071 | 1006.5 |
| ECH_0977 | putative phosphate ABC transporter, periplasmic phosphate-binding protein; | 509.165 | 493.05 | 399.603 | 458.84 |
| ECH_0978 | ribosomal protein S21;                                                     | 3111.96 | 4907.9 | 6161.69 | 3437.9 |
| ECH_0979 | succinyl-CoA synthetase, beta subunit;                                     | 2524.39 | 3088.1 | 3546.15 | 1889.6 |
| ECH_0980 | succinyl-CoA synthetase, alpha subunit;                                    | 1653.22 | 2379.7 | 1892.52 | 1498.1 |
| ECH_0981 | alanyl-tRNA synthetase;                                                    | 285.412 | 378.95 | 551.29  | 389.85 |
| ECH_0982 | phosphate ABC transporter, permease protein;                               | 134.9   | 157.53 | 166.776 | 139.45 |
| ECH_0983 | glutamine synthetase domain protein;                                       | 86.966  | 88.369 | 275.654 | 74.087 |
| ECH_0985 | metallo-beta-lactamase family protein;                                     | 212.803 | 187.45 | 220.56  | 360.31 |
| ECH_0986 | hypothetical protein;                                                      | 101.683 | 139.18 | 347.451 | 100.8  |
| ECH_0987 | hypothetical protein;                                                      | 107.412 |        |         | 101.41 |
| ECH_0988 | conserved hypothetical protein;                                            | 138.659 | 54.755 |         | 72.379 |
| ECH_0989 | conserved hypothetical protein;                                            | 109.734 | 45.622 | 196.479 | 48.91  |
| ECH_0991 | hypothetical protein;                                                      | 11.4412 | 19.575 |         | 14.494 |
| ECH_0992 | dihydrolipoamide dehydrogenase;                                            | 178.867 | 187.29 | 234.512 | 230.24 |
| ECH_0995 | hypothetical protein;                                                      | 199.735 | 294.56 |         | 395.3  |
| ECH_0996 | ATP-dependent protease HslV;                                               | 849.591 | 1152.5 | 976.141 | 1264.9 |
| ECH_0997 | heat shock protein HslVU, ATPase subunit HslU;                             | 818.885 | 994.42 | 587.759 | 994.79 |
| ECH_0998 | ubiquinone/menaquinone biosynthesis methyltransferase UbiE;                | 722.529 | 322.14 | 345.428 | 391.01 |
| ECH_1000 | methionyl-tRNA synthetase;                                                 | 177.996 | 243.41 | 344.544 | 309.7  |
| ECH_1001 | aspartate kinase;                                                          | 388.61  | 414.36 | 371.47  | 355.57 |
| ECH_1002 | cytochrome c oxidase, subunit II;                                          | 2773.63 | 2347.3 | 2256.9  | 1772.9 |
| ECH_1003 | cytochrome c oxidase, subunit I;                                           | 1740.27 | 2144.2 | 1371.24 | 1678.4 |
| ECH_1004 | protoheme IX farnesyltransferase;                                          | 717.967 | 919.52 | 1092.87 | 899.88 |
| ECH_1005 | putative competence protein ComL;                                          | 1496.89 | 1205.1 | 799.055 | 1362.1 |
| ECH_1006 | phosphoribosylamine--glycine ligase;                                       | 2030.05 | 2321.2 | 1292.93 | 2191.4 |
| ECH_1008 | preprotein translocase, YajC subunit;                                      | 5126.54 | 3620.7 | 3491.62 | 5174.5 |
| ECH_1009 | DNA polymerase III, beta subunit;                                          | 989.352 | 776.57 | 862.636 | 917.66 |
| ECH_1010 | DNA polymerase III, beta subunit, truncation;                              | 81.9579 | 92.957 |         | 107.33 |
| ECH_1011 | 3'-5' exonuclease family protein;                                          | 2253.97 | 2373.3 | 1104.59 | 2708.7 |
| ECH_1012 | DNA-binding response regulator;                                            | 5174.13 | 5428.9 | 1605.28 | 5771.7 |

|          |                                                           |         |        |         |        |
|----------|-----------------------------------------------------------|---------|--------|---------|--------|
| ECH_1013 | DNA-binding protein;                                      | 1323.38 | 1050.7 | 1004.29 | 1565.2 |
| ECH_1014 | inorganic pyrophosphatase;                                | 1661.67 | 448.74 | 536.031 | 689.34 |
| ECH_1017 | N-acetyl-gamma-glutamyl-phosphate reductase;              | 648.341 | 624.82 | 602.851 | 802.84 |
| ECH_1018 | ribosomal protein S9;                                     | 4009.18 | 4888   | 2734.5  | 5283.6 |
| ECH_1019 | ribosomal protein L13;                                    | 8579.94 | 10159  | 7568.67 | 10423  |
| ECH_1020 | putative outer membrane protein TolC;                     | 684.084 | 639.74 | 295.005 | 759.87 |
| ECH_1021 | conserved domain protein;                                 | 339.715 | 400.67 | 186.251 | 445.69 |
| ECH_1023 | conserved hypothetical protein;                           | 691.332 | 659.76 | 916.398 | 715.65 |
| ECH_1024 | ribose-phosphate pyrophosphokinase;                       | 88.455  | 100.84 | 155.491 | 94.634 |
| ECH_1025 | glutamyl-tRNA(Gln) amidotransferase subunit C;            | 556.081 | 588.21 | 385.105 | 614.77 |
| ECH_1030 | hypothetical protein;                                     | 52.4557 | 112.92 |         | 169.51 |
| ECH_1031 | aconitate hydratase 1;                                    | 784.39  | 907.04 | 987.206 | 929.96 |
| ECH_1033 | apaG protein;                                             | 2178.66 | 2696.6 | 4121.48 | 2856.3 |
| ECH_1034 | phosphoribosylaminoimidazole carboxylase, ATPase subunit; | 50.5608 | 54.681 | 375.318 | 65.206 |
| ECH_1036 | conserved domain protein;                                 | 75.1455 | 130.55 | 666.217 | 113.53 |
| ECH_1037 | hypothetical protein;                                     | 1045.93 | 1026.5 | 766.71  | 984.64 |
| ECH_1038 | hypothetical protein;                                     | 34.0411 | 40.315 | 511.696 | 44.655 |
| ECH_1041 | type IV secretion system protein VirB4;                   | 735.343 | 787.68 | 590.884 | 611.75 |
| ECH_1042 | conserved hypothetical protein;                           | 2897.98 | 3864.9 | 1725.27 | 3245.4 |
| ECH_1043 | conserved hypothetical protein;                           | 3065.45 | 4351.3 | 2072.02 | 4159.2 |
| ECH_1044 | conserved hypothetical protein;                           | 5780.57 | 8465.2 | 4059.46 | 8805.4 |
| ECH_1047 | conserved hypothetical protein;                           | 137.355 | 274.37 | 991.336 | 250.2  |
| ECH_1050 | hflK protein;                                             | 2012.36 | 1817.7 | 1530.09 | 1655.9 |
| ECH_1051 | hflC protein;                                             | 870.445 | 1108.1 | 319.77  | 794.36 |
| ECH_1052 | serine protease, DO/DeqQ family;                          | 1074.46 | 1422   | 854.412 | 1264   |
| ECH_1053 | conserved hypothetical protein;                           | 541.209 | 248.01 | 244.562 | 172.52 |
| ECH_1054 | ribonuclease III;                                         | 155.661 | 245.25 | 304.013 | 191.19 |
| ECH_1055 | cytochrome c oxidase assembly protein CtaG;               | 161.769 | 170.46 | 196.054 | 125.86 |
| ECH_1057 | peptidase, M16 family;                                    | 693.873 | 754.25 | 945.959 | 604.13 |
| ECH_1058 | peptidase, M16 family;                                    | 343.069 | 325.71 | 472.35  | 326.49 |
| ECH_1059 | conserved hypothetical protein;                           | 35577.8 | 38370  | 65132.9 | 30658  |
| ECH_1060 | signal peptidase II;                                      | 2810.13 | 2036.7 | 4885.34 | 1907.4 |
| ECH_1061 | riboflavin biosynthesis protein RibF;                     | 655.506 | 370.57 | 298.396 | 325.93 |
| ECH_1062 | glutaredoxin 3;                                           | 610.72  | 520.52 | 289.299 | 701.93 |



|          |                                                                                   |         |        |         |        |
|----------|-----------------------------------------------------------------------------------|---------|--------|---------|--------|
| ECH_1063 | modification methylase, HemK family;                                              | 201.317 | 106.77 | 330.012 | 157.9  |
| ECH_1064 | methionine aminopeptidase, type I;                                                | 388.453 | 443.67 | 928.868 | 480.46 |
| ECH_1065 | 2-oxoglutarate dehydrogenase, E2 component, dihydrolipoamide succinyltransferase; | 1449.3  | 1799.2 | 937.185 | 1965.8 |
| ECH_1066 | hexapeptide transferase family protein;                                           | 263.128 | 318.34 | 441.407 | 398.28 |
| ECH_1067 | D-alanyl-D-alanine carboxypeptidase family protein;                               | 582.949 | 475.27 | 389.541 | 442.75 |
| ECH_1068 | C-type cytochrome family protein;                                                 | 928.766 | 614.78 | 996.164 | 507.58 |
| ECH_1069 | TPR repeat-containing protein                                                     | 107.846 | 199.95 |         | 171.93 |
| ECH_1070 | putative membrane-associated zinc metalloprotease;                                | 2747.59 | 2660.2 | 1754.71 | 2437.4 |
| ECH_1071 | outer membrane protein, OMP85 family;                                             | 1104.85 | 991.01 | 671.496 | 835.19 |
| ECH_1072 | outer membrane protein, OmpH family;                                              | 2054.5  | 1399.4 | 1414.16 | 1821.9 |
| ECH_1073 | beta-hydroxyacyl-(acyl-carrier-protein) dehydratase FabZ;                         | 1302.82 | 942.91 | 688.911 | 1218.7 |
| ECH_1074 | phosphoribosylaminoimidazolecarboxamide formyltransferase/IMP cyclohydrolase;     | 337.77  | 387.69 | 251.958 | 385.53 |
| ECH_1077 | hypothetical protein;                                                             | 158.42  |        |         | 52.335 |
| ECH_1078 | CDP-diacylglycerol--glycerol-3-phosphate 3-phosphatidyltransferase;               | 566.191 | 249.54 | 502.387 | 296.13 |
| ECH_1079 | putative cytochrome c oxidase, subunit I;                                         | 98.6305 | 105.72 | 254.009 | 94.891 |
| ECH_1081 | SURF1 family protein;                                                             | 310.72  | 78.565 | 255.52  | 80.876 |
| ECH_1083 | pentapeptide repeat protein;                                                      | 163.898 | 94.619 | 170.257 | 77.14  |
| ECH_1084 | AraM protein;                                                                     | 684.787 | 364.76 | 554.552 | 307.48 |
| ECH_1086 | ATP synthase F0, A subunit;                                                       | 207.326 | 244.64 | 167.931 | 232.46 |
| ECH_1087 | ATP synthase F0, C chain;                                                         | 2617.66 | 11452  | 11016.1 | 13306  |
| ECH_1088 | ATP synthase F0, B' subunit;                                                      | 7563.08 | 6857.5 | 10489.4 | 6985.3 |
| ECH_1089 | ATP synthase F0, B chain;                                                         | 3119.55 | 2800.8 | 3288.13 | 2852.2 |
| ECH_1090 | cell division protein FtsA;                                                       | 1157.38 | 1236.4 | 1124.95 | 1049.6 |
| ECH_1093 | putative potassium uptake protein TrkH;                                           | 973.254 | 320.38 | 416.262 | 217.48 |
| ECH_1097 | tRNA(Ile)-lysidine synthetase;                                                    | 264.143 | 260.94 | 277.63  | 308.47 |
| ECH_1098 | ATP-dependent metalloprotease FtsH;                                               | 730.589 | 837.27 | 878.872 | 688.4  |
| ECH_1101 | prolipoprotein diacylglyceryl transferase;                                        | 1143.89 | 190.28 | 598.626 | 148.02 |
| ECH_1103 | conserved hypothetical protein;                                                   | 1170.04 | 758.04 | 1261.22 | 502.41 |
| ECH_1104 | hypothetical protein;                                                             | 767.823 | 1125.6 | 974.073 | 807.1  |
| ECH_1105 | conserved domain protein;                                                         | 254.208 | 331.38 |         | 372.75 |
| ECH_1106 | protein-export membrane protein SecD;                                             | 1128.36 | 958.44 | 788.477 | 864.01 |

|          |                                                              |         |        |         |        |
|----------|--------------------------------------------------------------|---------|--------|---------|--------|
| ECH_1107 | adenylyltransferase thiF;                                    | 357.45  | 580.66 | 388.351 | 651.97 |
| ECH_1108 | orotate phosphoribosyltransferase;                           | 1983.7  | 1371.7 | 938.117 | 1564.6 |
| ECH_1109 | recA protein;                                                | 3967.21 | 4350.8 | 1463.83 | 4477   |
| ECH_1110 | dethiobiotin synthetase;                                     | 151.865 | 116.49 | 196.054 | 152.99 |
| ECH_1111 | signal recognition particle-docking protein FtsY;            | 261.565 | 262.55 | 318.981 | 256.73 |
| ECH_1113 | hypothetical protein;                                        | 233.457 | 220.92 |         | 179.75 |
| ECH_1114 | dehydrogenase, isocitrate/isopropylmalate family;            | 1767.35 | 2008.8 | 919.788 | 1791.4 |
| ECH_1115 | single-stranded-DNA-specific exonuclease RecJ;               | 316.683 | 354.9  | 332.627 | 316.85 |
| ECH_1116 | polyA polymerase/tRNA nucleotidyltransferase family protein; | 138.487 | 86.94  | 257.503 | 94.321 |
| ECH_1117 | nucleoside diphosphate kinase;                               | 2622.08 | 2599.8 | 1689.08 | 2660.8 |
| ECH_1118 | putative transcriptional regulator;                          | 388.44  | 403.24 | 1279.85 | 244.27 |
| ECH_1119 | major outer membrane protein OMP-1M;                         | 1260.84 | 1404.7 | 1269.43 | 1500.3 |
| ECH_1121 | major outer membrane protein Omp-1N;                         | 1578.02 | 4412.6 | 3132.73 | 4612.4 |
| ECH_1122 | conserved hypothetical protein;                              | 4427.32 | 701.62 | 1244.74 | 1085.7 |
| ECH_1123 | major outer membrane protein OMP-1Q;                         | 7709    | 4795.1 | 3090.15 | 4430.1 |
| ECH_1124 | major outer membrane protein OMP-1P;                         | 5166.83 | 3905.1 | 2390.35 | 3696.3 |
| ECH_1125 | major outer membrane protein OMP-1T;                         | 2601.68 | 1913.5 | 1335.03 | 1631   |
| ECH_1126 | major outer membrane protein OMP-1U;                         | 3891.28 | 3286.2 | 1726.73 | 3171.8 |
| ECH_1127 | major outer membrane protein OMP-1V;                         | 6579.46 | 5283.4 | 3412.03 | 6190.1 |
| ECH_1128 | conserved hypothetical protein;                              | 1851.72 | 1004.8 | 1806.28 | 1282.5 |
| ECH_1129 | major outer membrane protein OMP-1W;                         | 2727.37 | 2482   | 1093.48 | 2668.4 |
| ECH_1130 | major outer membrane protein OMP-1X;                         | 4659.57 | 4788.4 | 1656.51 | 5178.3 |
| ECH_1131 | major outer membrane protein OMP-1Y;                         | 4593.53 | 5734.9 | 1485.48 | 6128.6 |
| ECH_1132 | major outer membrane protein OMP-1S;                         | 4053.41 | 4361.9 | 1506.66 | 5079.3 |
| ECH_1133 | major outer membrane protein OMP-1H;                         | 4222.07 | 3784.9 | 1456.96 | 4540.2 |
| ECH_1134 | major outer membrane protein OMP-1Z;                         | 4520.01 | 5195.3 | 1698.05 | 5628.3 |
| ECH_1135 | major outer membrane protein OMP-1A;                         | 3926.4  | 3780.9 | 1804.49 | 4680.9 |
| ECH_1136 | major outer membrane protein OMP-1B;                         | 698.247 | 969.26 | 8269.46 | 859.52 |
| ECH_1137 | major outer membrane protein OMP-1C;                         | 2718.49 | 2735.2 | 1557.96 | 2832.3 |
| ECH_1139 | major outer membrane protein OMP-1D;                         | 545.71  | 1131.6 | 285.542 | 1044.8 |
| ECH_1140 | major outer membrane protein OMP-1E;                         | 2795.38 | 2487.6 | 602.918 | 3010.8 |
| ECH_1142 | major outer membrane protein OMP-1F;                         | 2743.82 | 2257.5 | 775.144 | 2612.1 |
| ECH_1143 | major outer membrane protein P28;                            | 3957.1  | 22761  | 8358.7  | 30614  |
| ECH_1144 | major outer membrane protein P28-1;                          | 6874.84 | 6480.4 | 3853.32 | 7730.5 |

|          |                                              |         |             |           |          |
|----------|----------------------------------------------|---------|-------------|-----------|----------|
| ECH_1146 | major outer membrane protein P28-2;          | 190.857 | 141.9       | 1100.64   | 157.76   |
| ECH_1147 | conserved hypothetical protein;              | 1982.05 | 5528.3      | 2632.06   | 4756.9   |
| ECH_1148 | conserved hypothetical protein;              | 5187.27 | 5543.5      | 3800.42   | 6364.2   |
| ECH_1149 | preprotein translocase, SecA subunit;        | 609.747 | 685.24      | 752.183   | 498.4    |
| ECH_1150 | hypothetical protein;                        | 213.766 | 161.68      |           | 220.69   |
| ECH_1151 | hypothetical protein;                        | 472.828 | 278.36      | 1552.74   | 252.34   |
| ECH_1152 | hypothetical protein;                        | 3163.94 | 3849.5      | 7733.58   | 4380.7   |
| ECH_1153 | cell division protein FtsZ;                  | 4634.79 | 5167.1      | 2417.22   | 5269.5   |
| ECH_1154 | conserved hypothetical protein;              | 362.621 | 127.36      | 222.002   | 180.2    |
| ECH_1155 | conserved hypothetical protein TIGR00043;    | 137.765 | 49.886      | 236.529   | 67.336   |
| ECH_1156 | chromosome partitioning ATPase, ParA family; | 105.838 | 110.72      | 201.394   | 104.18   |
| ECH_0068 | hypothetical protein;                        | 190.584 | 113.9640612 | 58.514714 | 69.12354 |
| ECH_0610 | hypothetical protein;                        | 0.56099 | 0.733972196 |           | 111.1987 |
| ECH_0819 | hypothetical protein;                        | 2.96993 | 2.590490103 |           | 104.3906 |
| ECH_1138 | hypothetical protein;                        | 2.1037  |             |           | 142.0873 |
| ECH_0017 | hypothetical protein;                        | 7.3886  | 2.148211305 |           |          |
| ECH_0047 | hypothetical protein;                        | 11.921  | 7.339721959 | 6.4435846 |          |
| ECH_0051 | hypothetical protein;                        | 66.671  | 30.06463033 | 35.687546 |          |
| ECH_0053 | hypothetical protein;                        | 15.465  | 5.356013322 | 16.71849  |          |
| ECH_0054 | hypothetical protein;                        | 19.7029 | 18.25979609 | 30.174835 |          |
| ECH_0055 | hypothetical protein;                        | 20.8687 | 11.89034957 | 12.371682 |          |
| ECH_0059 | hypothetical protein;                        | 20.8687 | 11.89034957 | 12.371682 |          |
| ECH_0070 | hypothetical protein;                        | 12.3143 | 5.370528263 | 7.5437088 |          |
| ECH_0075 | hypothetical protein;                        | 2.40423 | 0           | 7.9305657 |          |
| ECH_0083 | hypothetical protein;                        | 0.96169 | 2.5164761   |           |          |
| ECH_0094 | hypothetical protein;                        | 5.01307 | 5.153421801 | 25.248332 |          |
| ECH_0102 | hypothetical protein;                        | 1.08578 | 1.775739184 | 6.8731569 |          |
| ECH_0104 | hypothetical protein;                        | 1.60282 | 0           |           |          |
| ECH_0110 | hypothetical protein;                        | 7.7675  | 3.952157978 | 6.5806822 |          |
| ECH_0111 | hypothetical protein;                        | 6.36795 | 5.951125913 |           |          |
| ECH_0112 | hypothetical protein;                        | 1.34637 | 1.76153327  |           |          |
| ECH_0182 | hypothetical protein;                        | 0.82096 | 0           |           |          |
| ECH_0216 | hypothetical protein;                        | 1.81941 | 2.380450365 | 17.673832 |          |
| ECH_0241 | hypothetical protein;                        | 1.34637 | 0.440383318 | 3.188578  |          |
| ECH_0242 | hypothetical protein;                        | 2.49327 | 4.485385642 | 6.1858412 |          |
| ECH_0244 | hypothetical protein;                        | 0.88577 | 1.158903467 |           |          |
| ECH_0245 | hypothetical protein;                        | 2.80493 | 4.281504476 |           |          |
| ECH_0262 | hypothetical protein;                        | 2.46287 | 0           |           |          |

|                                                                    |                                 |         |             |           |  |
|--------------------------------------------------------------------|---------------------------------|---------|-------------|-----------|--|
| ECH_0265                                                           | hypothetical protein;           | 3.13109 | 2.0482945   |           |  |
| ECH_0268                                                           | hypothetical protein;           | 0.68692 | 0.898741464 |           |  |
| ECH_0273                                                           | hypothetical protein;           | 2.14846 | 5.153421801 |           |  |
| ECH_0283                                                           | hypothetical protein;           | 2.14846 | 1.405478673 |           |  |
| ECH_0286                                                           | hypothetical protein;           | 5.74669 | 1.074105653 | 17.182892 |  |
| ECH_0358                                                           | hypothetical protein;           | 0.84148 | 0.550479147 | 8.836916  |  |
| ECH_0361                                                           | hypothetical protein;           | 1.74099 | 0.379640791 |           |  |
| ECH_0375                                                           | hypothetical protein;           | 0.80141 |             |           |  |
| ECH_0456                                                           | hypothetical protein;           | 0.88577 |             |           |  |
| <b><i>Ehrlichia chaffeensis</i> genes mapped to &lt; 10 reads.</b> |                                 |         |             |           |  |
| ECH_0457                                                           | hypothetical protein;           | 3.73991 | 0.489314797 |           |  |
| ECH_0506                                                           | hypothetical protein;           | 2.08201 | 2.497018811 |           |  |
| ECH_0524                                                           | hypothetical protein;           | 1.60282 | 1.572797563 |           |  |
| ECH_0582                                                           | hypothetical protein;           | 4.2074  | 1.032148401 |           |  |
| ECH_0598                                                           | hypothetical protein;           | 0       | 0.611643497 |           |  |
| ECH_0606                                                           | hypothetical protein;           | 0.56099 | 0.366986098 |           |  |
| ECH_0608                                                           | hypothetical protein;           | 2.01955 | 0.880766635 |           |  |
| ECH_0658                                                           | hypothetical protein;           | 1.46344 | 0.957355038 | 6.1858412 |  |
| ECH_0661                                                           | conserved hypothetical protein; | 6.1823  | 4.04433659  |           |  |
| ECH_0672                                                           | hypothetical protein;           | 1.71981 | 1.446514547 |           |  |
| ECH_0711                                                           | hypothetical protein;           | 2.34831 | 1.02414725  |           |  |
| ECH_0717                                                           | hypothetical protein;           | 0       | 1.785337774 |           |  |
| ECH_0719                                                           | hypothetical protein;           | 0.82096 | 0.537052826 |           |  |
| ECH_0736                                                           | hypothetical protein;           | 1.46344 | 0.478677519 |           |  |
| ECH_0749                                                           | hypothetical protein;           | 1.60282 | 2.097063417 |           |  |
| ECH_0867                                                           | hypothetical protein;           | 0       | 0.772602312 | 7.7323015 |  |
| ECH_0887                                                           | hypothetical protein;           | 0       | 0.579451734 | 8.3592449 |  |
| ECH_0968                                                           | hypothetical protein;           | 3.9599  | 1.295245052 |           |  |
| ECH_0969                                                           | hypothetical protein;           | 3.36592 | 3.082683223 |           |  |
| ECH_1022                                                           | hypothetical protein;           | 5.98385 | 0.489314797 |           |  |
| ECH_1027                                                           | hypothetical protein;           | 0.84148 | 0.550479147 |           |  |
| ECH_1029                                                           | hypothetical protein;           | 3.36592 | 3.963449858 |           |  |
| ECH_1056                                                           | hypothetical protein;           | 2.99193 | 3.914518378 |           |  |
| ECH_1082                                                           | hypothetical protein;           | 0       | 2.90819172  |           |  |
| ECH_1091                                                           | hypothetical protein;           | 1.86995 | 0.611643497 |           |  |
| ECH_1092                                                           | hypothetical protein;           | 2.88507 | 3.145595125 |           |  |

| Table S2. The top 100 highly expressed genes in transcriptome of wildtype <i>E. chaffeensis</i> |                                                 |               |
|-------------------------------------------------------------------------------------------------|-------------------------------------------------|---------------|
| Gene ID                                                                                         | Product                                         | Wildtype RPKM |
| ECH_0166                                                                                        | conserved hypothetical protein;                 | 42488.4       |
| ECH_1059                                                                                        | conserved hypothetical protein;                 | 35577.8       |
| ECH_0170                                                                                        | variable length PCR target protein;             | 17918.5       |
| ECH_0689                                                                                        | iron-sulfur cluster assembly accessory protein; | 17663.3       |
| ECH_0308                                                                                        | ribosomal protein S6;                           | 14180.2       |
| ECH_0570                                                                                        | hypothetical protein;                           | 13247.1       |
| ECH_0227                                                                                        | malonyl CoA-acyl carrier protein transacylase;  | 11175.8       |
| ECH_0253                                                                                        | hypothetical protein;                           | 10952.4       |
| ECH_0252                                                                                        | hypothetical protein;                           | 9827.77       |
| ECH_0963                                                                                        | ribosomal protein S12;                          | 8960.85       |
| ECH_0079                                                                                        | hypothetical protein;                           | 8953.79       |
| ECH_1019                                                                                        | ribosomal protein L13;                          | 8579.94       |
| ECH_0697                                                                                        | hypothetical protein;                           | 8509.63       |
| ECH_0298                                                                                        | cold shock protein, CSD family;                 | 8294.62       |
| ECH_0876                                                                                        | ribosomal protein L33;                          | 8272.92       |
| ECH_1123                                                                                        | major outer membrane protein OMP-1Q;            | 7709          |
| ECH_0484                                                                                        | 50S ribosomal protein L28;                      | 7585.98       |
| ECH_1088                                                                                        | ATP synthase F0, B' subunit;                    | 7563.08       |
| ECH_0432                                                                                        | DNA-directed RNA polymerase, alpha subunit;     | 7468.67       |
| ECH_0430                                                                                        | ribosomal protein S13;                          | 7384.34       |
| ECH_0009                                                                                        | putative membrane protein;                      | 7047.64       |
| ECH_1144                                                                                        | major outer membrane protein P28-1;             | 6874.84       |
| ECH_0364                                                                                        | chaperonin, 10 kDa;                             | 6801.56       |
| ECH_0707                                                                                        | hypothetical protein;                           | 6790.2        |
| ECH_1127                                                                                        | major outer membrane protein OMP-1V;            | 6579.46       |
| ECH_0309                                                                                        | putative ribosomal protein S18;                 | 6545.87       |
| ECH_0071                                                                                        | ribosomal protein S20;                          | 6265.18       |
| ECH_0365                                                                                        | chaperonin, 60 kd;                              | 6017.96       |
| ECH_1044                                                                                        | conserved hypothetical protein;                 | 5780.57       |
| ECH_0199                                                                                        | conserved hypothetical protein;                 | 5628.22       |
| ECH_0690                                                                                        | signal peptidase I;                             | 5614.13       |
| ECH_0122                                                                                        | hypothetical protein;                           | 5514.52       |
| ECH_0172                                                                                        | preprotein translocase, SecG subunit;           | 5505.56       |

|          |                                                        |          |
|----------|--------------------------------------------------------|----------|
| ECH_0676 | arginine biosynthesis bifunctional protein ArgJ;       | 5470.9   |
| ECH_0310 | ribosomal protein L9;                                  | 5385.81  |
| ECH_0912 | ribosomal protein S4;                                  | 5230.68  |
| ECH_1148 | conserved hypothetical protein;                        | 5187.27  |
| ECH_1012 | DNA-binding response regulator;                        | 5174.134 |
| ECH_1124 | major outer membrane protein OMP-1P;                   | 5166.83  |
| ECH_1008 | preprotein translocase, YajC subunit;                  | 5126.54  |
| ECH_0734 | antioxidant, AhpC/Tsa family;                          | 4875.62  |
| ECH_0681 | hypothetical protein;                                  | 4787.59  |
| ECH_0431 | ribosomal protein S11;                                 | 4707.86  |
| ECH_1130 | major outer membrane protein OMP-1X;                   | 4659.57  |
| ECH_0862 | hypothetical protein;                                  | 4653.15  |
| ECH_1153 | cell division protein FtsZ;                            | 4634.79  |
| ECH_1131 | major outer membrane protein OMP-1Y;                   | 4593.53  |
| ECH_0198 | ribosomal protein L35;                                 | 4522.63  |
| ECH_1134 | major outer membrane protein OMP-1Z;                   | 4520.01  |
| ECH_1122 | conserved hypothetical protein;                        | 4427.32  |
| ECH_0573 | ATP synthase F1, beta subunit;                         | 4397.11  |
| ECH_0233 | protein-export protein SecB;                           | 4262.32  |
| ECH_1133 | major outer membrane protein OMP-1H;                   | 4222.07  |
| ECH_0520 | ubiquinol-cytochrome c reductase, iron-sulfur subunit; | 4210.67  |
| ECH_0197 | ribosomal protein L20;                                 | 4187.32  |
| ECH_0147 | conserved hypothetical protein;                        | 4121.06  |
| ECH_0702 | folylpolyglutamate synthase;                           | 4118.64  |
| ECH_1132 | major outer membrane protein OMP-1S;                   | 4053.41  |
| ECH_1018 | ribosomal protein S9;                                  | 4009.18  |
| ECH_0727 | ribosomal protein S15;                                 | 3986.2   |
| ECH_1109 | recA protein;                                          | 3967.21  |
| ECH_1143 | major outer membrane protein P28;                      | 3957.1   |
| ECH_1135 | major outer membrane protein OMP-1A;                   | 3926.4   |
| ECH_0462 | OmpA family protein;                                   | 3901.23  |
| ECH_0193 | major facilitator family transporter;                  | 3894.26  |
| ECH_1126 | major outer membrane protein OMP-1U;                   | 3891.28  |
| ECH_0811 | enoyl-(acyl-carrier-protein) reductase;                | 3875.96  |
| ECH_0726 | polyribonucleotide nucleotidyltransferase;             | 3812.81  |
| ECH_0004 | ribosomal protein L19;                                 | 3780.85  |
| ECH_0961 | translation elongation factor G;                       | 3746.54  |
| ECH_0443 | dihydrodipicolinate reductase;                         | 3714.48  |
| ECH_0010 | hypothetical protein;                                  | 3668.83  |

|          |                                                        |         |
|----------|--------------------------------------------------------|---------|
| ECH_0192 | ribosomal protein S16;                                 | 3521.36 |
| ECH_0627 | conserved hypothetical protein;                        | 3437.62 |
| ECH_0825 | hypothetical protein;                                  | 3431.48 |
| ECH_0444 | phosphate ABC transporter, ATP-binding protein;        | 3422.81 |
| ECH_0705 | peptide chain release factor 2, programmed frameshift; | 3364.17 |
| ECH_0638 | ribose 5-phosphate isomerase B;                        | 3274    |
| ECH_0311 | serine hydroxymethyltransferase;                       | 3271.5  |
| ECH_0858 | DNA gyrase, A subunit;                                 | 3263.43 |
| ECH_0779 | phosphatidylserine decarboxylase;                      | 3257.68 |
| ECH_0886 | acetylmethionine/succinylmethionine aminotransferase;  | 3243.91 |
| ECH_1152 | hypothetical protein;                                  | 3163.94 |
| ECH_1089 | ATP synthase F0, B chain;                              | 3119.55 |
| ECH_0804 | DNA-binding protein HU;                                | 3113.23 |
| ECH_0978 | ribosomal protein S21;                                 | 3111.96 |
| ECH_1043 | conserved hypothetical protein;                        | 3065.45 |
| ECH_0744 | conserved hypothetical protein;                        | 3042.46 |
| ECH_0962 | ribosomal protein S7;                                  | 3014.19 |
| ECH_0433 | ribosomal protein L17;                                 | 3003.07 |
| ECH_0896 | rhodanese domain protein;                              | 2973.13 |
| ECH_0471 | chaperone protein DnaK;                                | 2933.79 |
| ECH_0953 | ribosomal protein L7/L12;                              | 2914.59 |
| ECH_0929 | putative lipoprotein;                                  | 2898.72 |
| ECH_1042 | conserved hypothetical protein;                        | 2897.98 |
| ECH_0008 | P-loop hydrolase family protein;                       | 2879.4  |
| ECH_0142 | ribosomal 5S rRNA E-loop binding protein Ctc/L25/TL5;  | 2875.81 |
| ECH_0888 | putative membrane protein;                             | 2867.5  |
| ECH_0652 | ATP synthase F1, gamma subunit;                        | 2852.18 |
| ECH_0377 | conserved domain protein;                              | 2827.77 |

| Table S3: Primers used for qRT-PCR               |             |           |                                   |                    |
|--------------------------------------------------|-------------|-----------|-----------------------------------|--------------------|
| primer name                                      | gene target | gene name | sequence                          | amplicon size (bp) |
| RG338                                            | ECH_1146    | OMP-p28-2 | F-CCCACACAAGAAAAAGGAACA           | 147                |
| RG339                                            |             |           | R-GCACATTGCTTTAGTCAGATCC          |                    |
| RRG1061                                          | ECH_1143    | OMP-p28   | F-AGGCGAAGGCATACCTTTTT            | 156                |
| RRG1062                                          |             |           | R-TGCCACCAATAAACACAGA             |                    |
| RG320                                            | ECH_1136    | Omp1B     | F- AACGACAGCAGAGAAGGC             | 182                |
| RG321                                            |             |           | R- AACAGGACAGATCCAGCC             |                    |
| RG322                                            | ECH_1121    | Omp1N     | F-TCATGTTTAGGATTTGGAGTA           | 220                |
| RG323                                            |             |           | R- GTGGCTTGCTGTTTGGT              |                    |
| RRG1009                                          | ECH_0367    | ClpB      | F-TCTTGGAAATGCTTGTTGCTG           | 196                |
| RRG1010                                          |             |           | R-ACCCCTTGCTAAAGCAGGTT            |                    |
| RRG1027                                          | ECH_0655    | rpoH      | F-AAAATGGGATCGTTGCTGAC            | 170                |
| RRG1028                                          |             |           | R-AAAGCCAAGAGTGGGATTGA            |                    |
| RRG2054                                          | ECH_0466    | ECH_0466  | F-TGCTGCAAATTTGTTTGGAA            | 165                |
| RRG2055                                          |             |           | R-TCTCCAAAAGAACCATGAAGA           |                    |
| RRG2058                                          | ECH_0469    | mrpC      | F-GGTTATAGGTTTGTATGTTACT          | 213                |
|                                                  |             |           | ACTGC                             |                    |
| RRG2059                                          |             |           | R-ATTGCAACCCCAACAACAAT            |                    |
| RRG985                                           | ECH_0085    | ECH_0085  | F-GGAAAATTGCTGCTTCTGGA            | 162                |
| RRG986                                           |             |           | R-AGCCTGAAGTTGGTTCATCC            |                    |
| RG332                                            | ECH_0972    | ECH_0972  | F- GCCCATCAATAAAGACGAC            | 135                |
| RG333                                            |             |           | R- TTGCTCTGATTGGGACAACA           |                    |
| RG334                                            | ECH_1093    | ECH_1093  | F-ATGACATCCCAGCAATCCAA            | 168                |
| RG335                                            |             |           | R-TGCCTTGCTTGAAAGTTGTG            |                    |
| RG330                                            | ECH_0299    | ECH_0299  | F- CAGCTGCATGGTCTGATGTT           | 167                |
| RG331                                            |             |           | R- CGTCACATGGCGAATTATTG           |                    |
| RG328                                            | ECH_0033    | ECH_0033  | F- GCAATGTCACGTGCTGAACT           | 122                |
| RG329                                            |             |           | R- GGTCCAAGAAATGCTGGAAG           |                    |
| <b>Primers used for Semi quantitative RT-PCR</b> |             |           |                                   |                    |
| RG627                                            | ECH_0490    | lipA      | F- AGGTTGCTGATGCTGCTCCTGATG       | 310                |
| RG628                                            |             |           | R- ACTAAAGGGCCCGACGCAACC          |                    |
| RG629                                            | ECH_0492    | ECH_0492  | F- ACGGATGGTGGCACTGCTGC           | 271                |
| RG630                                            |             |           | R- TCGATTACCTATAGGTATCACAT<br>CCG |                    |



Original image for Fig S1 lane 4 of panel B

ECH\_0490

4

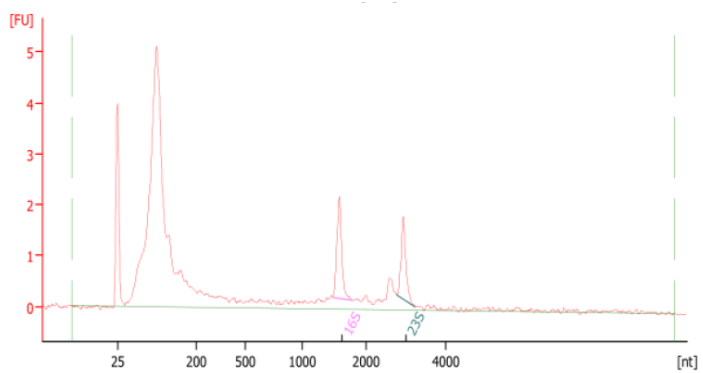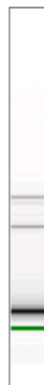

RNA ladder

Electropherogram Summary

Ladder

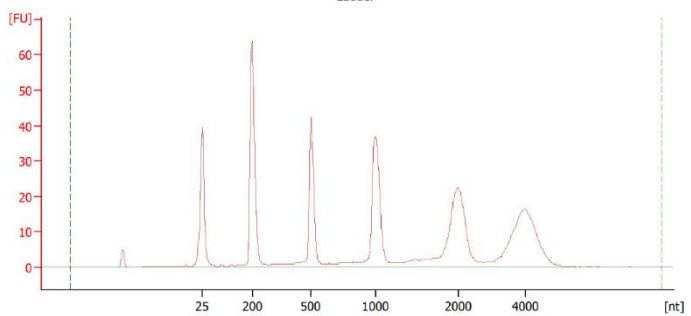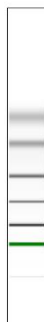

Supplement: 41598_2018_24471_MOESM1_ESM.pdf [file 41598_2018_24471_MOESM1_ESM.pdf]
